# Supplementary material for: Comparative genomics and functional analysis of the 936 group of lactococcal Siphoviridae phages
Source: PubMed Central journal article supplement (PMC4759559; doi:10.1038/srep21345), 2016-02-19
Supplement: srep21345-s1.pdf [file srep21345-s1.pdf]

1 **Title: Comparative genomics and functional analysis of the 936 group of lactococcal**  
2 ***Siphoviridae* phages**

3 **Authors: James Murphy<sup>1</sup>, Francesca Bottacini<sup>2</sup>, Jennifer Mahony<sup>1</sup>, Philip Kelleher<sup>1</sup>,**  
4 **Horst Neve<sup>3</sup>, Aldert Zomer<sup>1,2,\*</sup>, Arjen Nauta<sup>4</sup> and Douwe van Sinderen<sup>1,2,#</sup>.**

5 <sup>1</sup>School of Microbiology, University College Cork, Cork, Ireland,

6 <sup>2</sup>Alimentary Pharmabiotic Centre, University College Cork, Cork, Ireland,

7 <sup>3</sup>Department of Microbiology and Biotechnology, Max Rubner Institut, Kiel, Germany

8 <sup>4</sup>FrieslandCampina, Amersfoort, The Netherlands.

9

10

11

12

13

14

15

16

17

18

19

20

21

22

23

24

25

26

27

28

29

30

31 **Figure S1. Amino acid sequence alignment of the TpeX homologs in the 936 group**  
32 **phages.** Differences in amino acid sequences in comparison to PhiC0139 are shaded black.  
33 Potential amino acids involved in carbohydrate binding as determined by HHPRED are  
34 highlighted in the red boxes.

35 **Figure S2.** Dotplot analysis of a selection of 936 group phages. Sites were loss of synteny  
36 correlate with sites of gene arrangements are highlighted by black arrows. **A)** 340 vs 645. **B)**  
37 P008 vs PhiA.16. **C)** ASCC532 vs P008. **D)** PhiM.16 vs ASCC532. **E)** Phi19.2 vs PhiM.16  
38 and **F)** Phi19.2 vs Phi5.12

39  
40  
41  
42  
43  
44  
45  
46  
47  
48  
49  
50  
51  
52  
53  
54  
55  
56

57 **Figure S1**

58  
59  
60  
61  
62  
63  
64

```
10 20 30 40 50 60 70 80
PhiC0139_1 PSVDPGAHVAFAYSADGRDRFTTVWPNLNLLDGTDRDFS --- GPWENAGIWNVNDG --- TYKGLTVKSYQGTW
PhiB1127_1 PSVDPGAHVAFAYSADGRDRFTTVWPNLNLLDGTDRDFS --- GPWENAGIWNVNDG --- TYKGLTVKSYQGTW
Phi17_14 PEFPADEALMTAAAYSADGRDRFTTVWPNLNLLDGTDRDFS --- GPWENAGIWNVNDG --- TYKGLTVKSYQGTW
Phi5.12_13 PEFPADEALMTAAAYSADGRDRFTTVWPNLNLLDGTDRDFS --- GPWENAGIWNVNDG --- TYKGLTVKSYQGTW
Phi145_14 PEFPADEALMTAAAYSADGRDRFTTVWPNLNLLDGTDRDFS --- GPWENAGIWNVNDG --- TYKGLTVKSYQGTW
Phi91127_14 PEFPADEALMTAAAYSADGRDRFTTVWPNLNLLDGTDRDFS --- GPWENAGIWNVNDG --- TYKGLTVKSYQGTW
Phi16_15 PEFPADEALMTAAAYSADGRDRFTTVWPNLNLLDGTDRDFS --- GPWENAGIWNVNDG --- TYKGLTVKSYQGTW
Phi40_15 PEFPADEALMTAAAYSADGRDRFTTVWPNLNLLDGTDRDFS --- GPWENAGIWNVNDG --- TYKGLTVKSYQGTW
Phi93_16 PEFPADEALMTAAAYSADGRDRFTTVWPNLNLLDGTDRDFS --- GPWENAGIWNVNDG --- TYKGLTVKSYQGTW
PhiL.18_14 PEFPADEALMTAAAYSADGRDRFTTVWPNLNLLDGTDRDFS --- GPWENAGIWNVNDG --- TYKGLTVKSYQGTW
Phi109_15 PEFPADEALMTAAAYSADGRDRFTTVWPNLNLLDGTDRDFS --- GPWENAGIWNVNDG --- TYKGLTVKSYQGTW
PhiL.6_14 PEFPADEALMTAAAYSADGRDRFTTVWPNLNLLDGTDRDFS --- GPWENAGIWNVNDG --- TYKGLTVKSYQGTW
Phi4.2_13 PEFPADEALMTAAAYSADGRDRFTTVWPNLNLLDGTDRDFS --- GPWENAGIWNVNDG --- TYKGLTVKSYQGTW
PhiM1127_15 PEFPADEALMTAAAYSADGRDRFTTVWPNLNLLDGTDRDFS --- GPWENAGIWNVNDG --- TYKGLTVKSYQGTW
PhiM.5_14 PEFPADEALMTAAAYSADGRDRFTTVWPNLNLLDGTDRDFS --- GPWENAGIWNVNDG --- TYKGLTVKSYQGTW
P113G_0012 PSVDPGAHVAFAYSADGRDRFTTVWPNLNLLDGTDRDFS --- GPWENAGIWNVNDG --- TYKGLTVKSYQGTW
Phi7_gp13 PEFPADEALMTAAAYSADGRDRFTTVWPNLNLLDGTDRDFS --- GPWENAGIWNVNDG --- TYKGLTVKSYQGTW
P475_0013 PSVDPGAHVAFAYSADGRDRFTTVWPNLNLLDGTDRDFS --- GPWENAGIWNVNDG --- TYKGLTVKSYQGTW
712_12 PSVDPGAHVAFAYSADGRDRFTTVWPNLNLLDGTDRDFS --- GPWENAGIWNVNDG --- TYKGLTVKSYQGTW
```

65  
66  
67  
68  
69  
70  
71

```
90 100 110 120 130 140 150 160
PhiC0139_13 --- NGVFRKYL --- VPQDGLYTWSSFEVRSDS DTSNVRVLFINM --- VQKPNVGLGRKFDWLRDSVTVSLKKGDEV
PhiB1127_13 --- NGVFRKYL --- VPQDGLYTWSSFEVRSDS DTSNVRVLFINM --- VQKPNVGLGRKFDWLRDSVTVSLKKGDEV
Phi17_14 --- NAWWSINCEKNECDTIEVARVCSNCTGCGSWSSNEVRCMTAANDMETVEINNVYI
Phi5.12_13 --- NAWWSINCEKNECDTIEVARVCSNCTGCGSWSSNEVRCMTAANDMETVEINNVYI
Phi145_14 --- NAWWSINCEKNECDTIEVARVCSNCTGCGSWSSNEVRCMTAANDMETVEINNVYI
Phi91127_14 --- NAWWSINCEKNECDTIEVARVCSNCTGCGSWSSNEVRCMTAANDMETVEINNVYI
Phi16_15 --- NAWWSINCEKNECDTIEVARVCSNCTGCGSWSSNEVRCMTAANDMETVEINNVYI
Phi40_15 --- NAWWSINCEKNECDTIEVARVCSNCTGCGSWSSNEVRCMTAANDMETVEINNVYI
Phi93_16 --- NAWWSINCEKNECDTIEVARVCSNCTGCGSWSSNEVRCMTAANDMETVEINNVYI
PhiL.18_14 --- NAWWSINCEKNECDTIEVARVCSNCTGCGSWSSNEVRCMTAANDMETVEINNVYI
Phi109_15 --- NAWWSINCEKNECDTIEVARVCSNCTGCGSWSSNEVRCMTAANDMETVEINNVYI
PhiL.6_14 --- NAWWSINCEKNECDTIEVARVCSNCTGCGSWSSNEVRCMTAANDMETVEINNVYI
Phi4.2_13 FAFIRKFNELISSEFENVVKEENECYTESWIKETCHHITLAWNLWNEFNEQITLITLIGTWKYLITLWNSZAFATITTEEV
PhiM1127_15 --- NAWWSINCEKNECDTIEVARVCSNCTGCGSWSSNEVRCMTAANDMETVEINNVYI
PhiM.5_14 --- NAWWSINCEKNECDTIEVARVCSNCTGCGSWSSNEVRCMTAANDMETVEINNVYI
P113G_0012 --- CGGTSRTEET --- FPDGTYTSSAYVKSSCNNAETREVIIVLKGTSIVPKKRGHFDWLRDSSESLKLGKRV
Phi7_gp13 --- CGGTSRTEET --- FPDGTYTSSAYVKSSCNNAETREVIIVLKGTSIVPKKRGHFDWLRDSSESLKLGKRV
P475_0013 --- CGGTSRTEET --- FPDGTYTSSAYVKSSCNNAETREVIIVLKGTSIVPKKRGHFDWLRDSSESLKLGKRV
712_12 --- CGGTSRTEET --- FPDGTYTSSAYVKSSCNNAETREVIIVLKGTSIVPKKRGHFDWLRDSSESLKLGKRV
```

72  
73  
74  
75  
76  
77  
78

```
170 180 190 200 210 220 230
PhiC0139_13 IFNYGNSEKN --- GGVSIAGYKLETGSIATPWPMPFSEVTPSDYPSYIGTYTDNDSSKQSTDPARYTWKKIVE
PhiB1127_13 IFNYGNSEKN --- GGVSIAGYKLETGSIATPWPMPFSEVTPSDYPSYIGTYTDNDSSKQSTDPARYTWKKIVE
Phi17_14 VASYSKSEHITITICGHNCKE KLE GSVTPWMSSESEIE SDYPSYIGNYTCRIVIE QSTDPRYRWKKIE
Phi5.12_13 VASYSKSEHITITICGHNCKE KLE GSVTPWMSSESEIE SDYPSYIGNYTCRIVIE QSTDPRYRWKKIE
Phi145_14 VASYSKSEHITITICGHNCKE KLE GSVTPWMSSESEIE SDYPSYIGNYTCRIVIE QSTDPRYRWKKIE
Phi91127_14 VASYSKSEHITITICGHNCKE KLE GSVTPWMSSESEIE SDYPSYIGNYTCRIVIE QSTDPRYRWKKIE
Phi16_15 VASYSKSEHITITICGHNCKE KLE GSVTPWMSSESEIE SDYPSYIGNYTCRIVIE QSTDPRYRWKKIE
Phi40_15 VASYSKSEHITITICGHNCKE KLE GSVTPWMSSESEIE SDYPSYIGNYTCRIVIE QSTDPRYRWKKIE
Phi93_16 VASYSKSEHITITICGHNCKE KLE GSVTPWMSSESEIE SDYPSYIGNYTCRIVIE QSTDPRYRWKKIE
PhiL.18_14 VASYSKSEHITITICGHNCKE KLE GSVTPWMSSESEIE SDYPSYIGNYTCRIVIE QSTDPRYRWKKIE
Phi109_15 VASYSKSEHITITICGHNCKE KLE GSVTPWMSSESEIE SDYPSYIGNYTCRIVIE QSTDPRYRWKKIE
PhiL.6_14 VASYSKSEHITITICGHNCKE KLE GSVTPWMSSESEIE SDYPSYIGNYTCRIVIE QSTDPRYRWKKIE
Phi4.2_13 GFHISEVMG --- SEINIKKEKVEGSIATPMPFSEVTPSDYPSYIGTYTDNDSSKQSTDPARYSWKIE
PhiM1127_15 VASYSKSEHITITICGHNCKE KLE GSVTPWMSSESEIE SDYPSYIGNYTCRIVIE QSTDPRYRWKKIE
PhiM.5_14 VASYSKSEHITITICGHNCKE KLE GSVTPWMSSESEIE SDYPSYIGNYTCRIVIE QSTDPRYRWKKIE
P113G_0012 SATYELTSCG --- SISIIWAGKVEGSIATPWPMPFSEVTPSDYPSYIGTYTDNDSSKQSTDPARYTWKKIE
Phi7_gp13 SATYELTSCG --- SISIIWAGKVEGSIATPWPMPFSEVTPSDYPSYIGTYTDNDSSKQSTDPARYTWKKIE
P475_0013 SATYELTSCG --- SISIIWAGKVEGSIATPWPMPFSEVTPSDYPSYIGTYTDNDSSKQSTDPARYTWKKIE
712_12 SATYELTSCG --- SISIIWAGKVEGSIATPWPMPFSEVTPSDYPSYIGTYTDNDSSKQSTDPARYTWKKIE
```

79  
80  
81  
82  
83

84 **Figure S2**

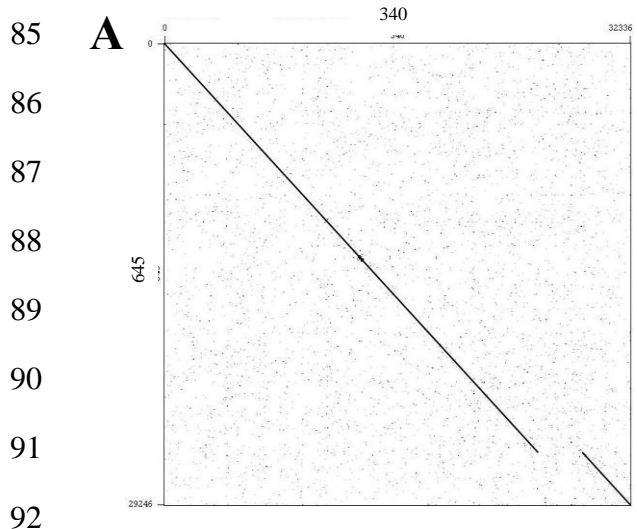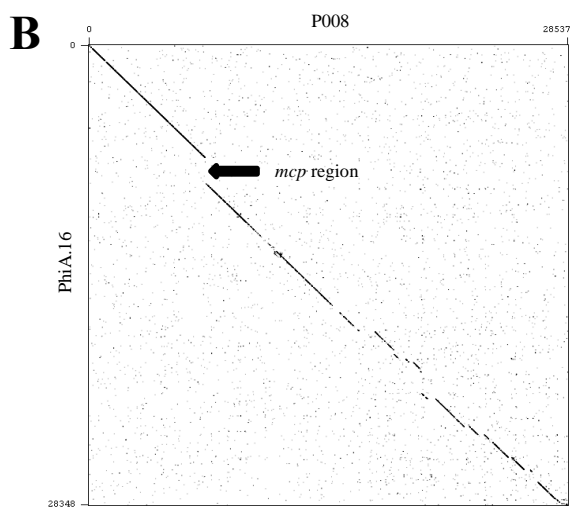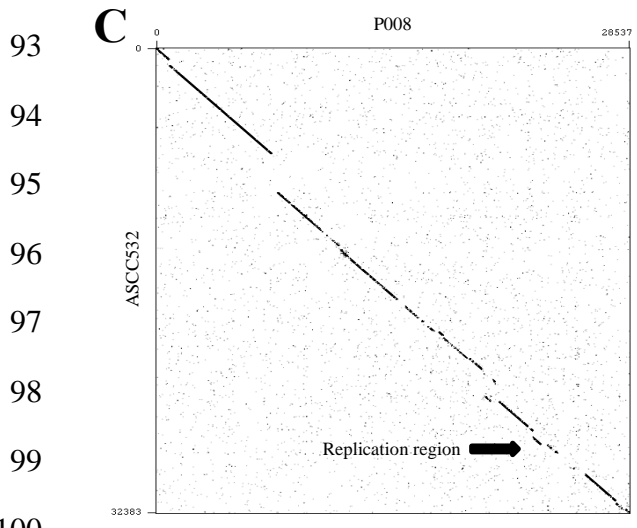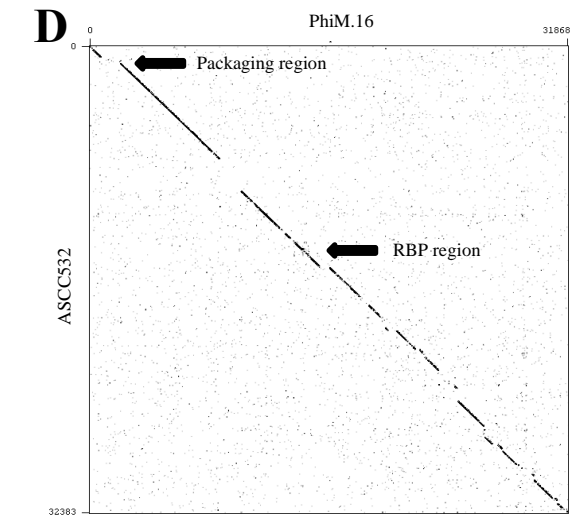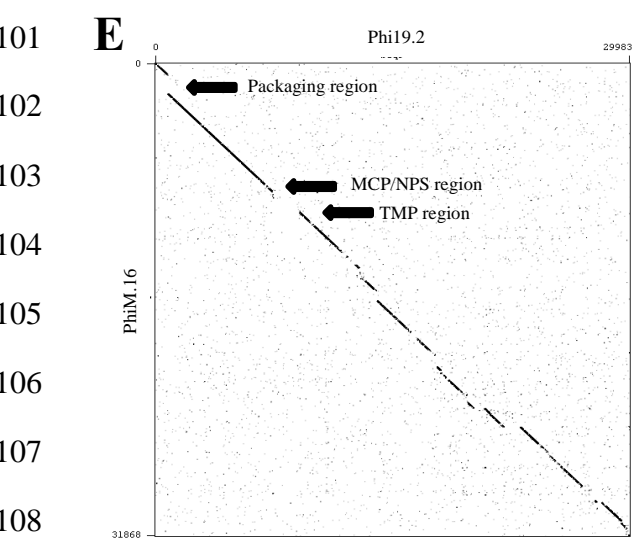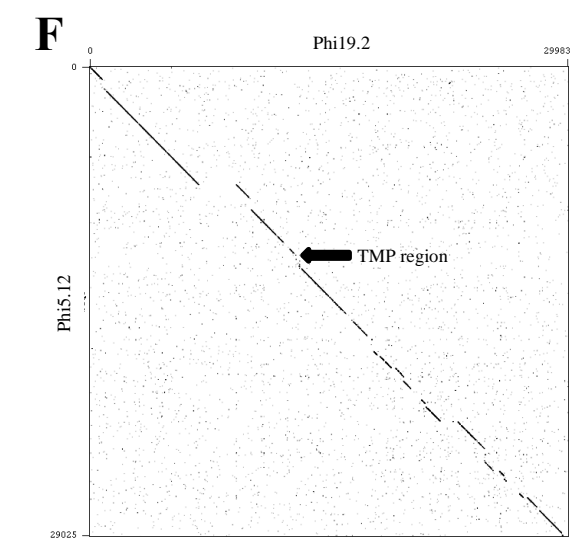

109

110

111 **Table S1.** Bacteria, plasmids, additional phages and primers used in this study.

| <b>Lactococcal subspecies</b>                     | <b>Strain (CWPS type)</b>                        | <b>Source</b> |
|---------------------------------------------------|--------------------------------------------------|---------------|
| <i>ssp. lactis</i>                                | SM A (Unknown)                                   | 36            |
| <i>ssp. cremoris</i>                              | SM B (A)                                         | 36            |
| <i>ssp. cremoris</i>                              | SM C (A)                                         | 36            |
| <i>ssp. cremoris</i>                              | SM D (Unknown)                                   | 36            |
| <i>ssp. lactis</i> biovar<br><i>diacetylactis</i> | SM E (Unknown)                                   | 36            |
| <i>ssp. lactis</i>                                | SM F (Unknown)                                   | 36            |
| <i>ssp. cremoris</i>                              | SM G (Unknown)                                   | 36            |
| <i>ssp. cremoris</i>                              | SM H (C)                                         | 36            |
| <i>ssp. cremoris</i>                              | SM I (C)                                         | 36            |
| <i>ssp. cremoris</i>                              | SM J (C)                                         | 36            |
| <i>ssp. cremoris</i>                              | SM K (Unknown)                                   | 36            |
| <i>ssp. lactis</i> biovar<br><i>diacetylactis</i> | SM L (Unknown)                                   | 36            |
| <i>ssp. lactis</i> biovar<br><i>diacetylactis</i> | SM M (Unknown)                                   | 36            |
| <i>ssp. lactis</i>                                | SM N (C)                                         | 36            |
| <i>ssp. cremoris</i>                              | SM O (C)                                         | 36            |
| <i>ssp. lactis</i>                                | SM P (C)                                         | 36            |
| <i>ssp. cremoris</i>                              | SM Q (C)                                         | 36            |
| <i>ssp. cremoris</i>                              | SM R (C)                                         | 36            |
| <i>ssp. cremoris</i>                              | SM S (C)                                         | 36            |
| <i>ssp. cremoris</i>                              | SM T (C)                                         | 36            |
| <i>ssp. cremoris</i>                              | SM 1 (C)                                         | 36            |
| <i>ssp. lactis</i> biovar<br><i>diacetylactis</i> | SM 2 (B)                                         | 36            |
| <i>ssp. cremoris</i>                              | SM 3 (Unknown)                                   | 36            |
| <i>ssp. cremoris</i>                              | SM 4 (C)                                         | 36            |
| <i>ssp. lactis</i> biovar<br><i>diacetylactis</i> | SM 5 (C)                                         | 36            |
| <i>ssp. lactis</i> biovar<br><i>diacetylactis</i> | SM 6 (B)                                         | 36            |
| <i>ssp. cremoris</i>                              | SM 7 (C)                                         | 36            |
| <i>ssp. lactis</i> biovar<br><i>diacetylactis</i> | SM 8 (Unknown)                                   | 36            |
| <i>ssp. lactis</i> biovar<br><i>diacetylactis</i> | SM 9 (Unknown)                                   | 36            |
| <i>ssp. cremoris</i>                              | SM 10 (B)                                        | 36            |
| <i>ssp. cremoris</i>                              | SM 11 (C)                                        | 36            |
| <i>ssp. lactis</i>                                | SM 12 (Unknown)                                  | 36            |
| <i>ssp. lactis</i>                                | SM 13 (C)                                        | 36            |
| <i>ssp. lactis</i> biovar<br><i>diacetylactis</i> | SM 14 (B)                                        | 36            |
| <i>ssp. lactis</i>                                | SM 15 (C)                                        | 36            |
| <i>ssp. lactis</i> biovar<br><i>diacetylactis</i> | SM 16 (Unknown)                                  | 36            |
| <i>ssp. lactis</i> biovar<br><i>diacetylactis</i> | SM 17 (B)                                        | 36            |
| <i>ssp. cremoris</i>                              | SM 18 (C)                                        | 36            |
| <i>ssp. cremoris</i>                              | SM 19 (C)                                        | 36            |
| <i>ssp. cremoris</i>                              | SM 20 (Unknown)                                  | 36            |
| <i>ssp. cremoris</i>                              | UC509.9 (A). Host for Tuc2009                    | 49            |
| <i>ssp. cremoris</i>                              | 158 (A). Host for P1084                          | 50            |
| <i>ssp. lactis</i>                                | IL1403 (B). Host for P008                        | 51            |
| <b>Additional phages</b>                          | <b>Features</b>                                  |               |
| Tuc2009                                           | P335 group phage. Negative control for Phi15-NPS | 49            |

|                 |                                                                                              |                        |
|-----------------|----------------------------------------------------------------------------------------------|------------------------|
| P1084           | 936 group phage with spiral like decorations. Genome not sequenced                           | Personal communication |
| P008            | 936 group phage. Negative control for TpxE antibodies                                        | <sup>52</sup>          |
| <b>Plasmids</b> | <b>Features</b>                                                                              | <b>Source</b>          |
| pTX8048         | Chloramphenicol resistant                                                                    | <sup>45</sup>          |
| pTX15_NPS       | pTX8048 derivative encoding <i>npsPhi15</i>                                                  | This study             |
| pNZtpeX         | pNZ8048 derivative encoding <i>fiberPhiC0139</i>                                             | This study             |
| <b>Primers</b>  | <b>Features</b>                                                                              | <b>Source</b>          |
| mcsPTX8048 F    | TAACCTGGCCGGTTCTGGTTC                                                                        | This study             |
| mcsPTX8048 R    | CGTTTCAAGCCTTGGTTTTTC                                                                        | This study             |
| Phi15_NPSF      | aaattt <b>GGATCC</b> ATGAGTTTAGATAAATTTTAG                                                   | This study             |
| Phi15_NPSR      | aaattt <b>TCTAGACTA</b> ATCAATGAAATAGCTTG                                                    | This study             |
| C0139tpeX_F     | agcagc <b>CCATGG</b> cc <b>CACCATCACCATCACCAT</b> tcttctggt<br>GACGGGGCTCACCACG <sup>c</sup> | This study             |
| C0139 tpeX_R    | agcagc <b>TCTAGATTATTCTACTATTTTTTTTCCAGGTATATC</b>                                           | This study             |

112

113

114

115

116

117

118

119

120

121

122

123

124

125

126

127

128

129

130

131

132 **Text file 1. The core genes of the 936 group phage and their predicted function**

| 133 | <b>Protein Function</b> | <b>ID</b>    |
|-----|-------------------------|--------------|
| 134 | Small Terminase         | 340_001      |
| 135 | Small Terminase         | 645_001      |
| 136 | Small Terminase         | 936_001      |
| 137 | Small Terminase         | ASCC191_0001 |
| 138 | Small Terminase         | ASCC273_0001 |
| 139 | Small Terminase         | ASCC281_0001 |
| 140 | Small Terminase         | ASCC284_0001 |
| 141 | Small Terminase         | ASCC287_0001 |
| 142 | Small Terminase         | ASCC310_0001 |
| 143 | Small Terminase         | ASCC324_0001 |
| 144 | Small Terminase         | ASCC337_0001 |
| 145 | Small Terminase         | ASCC356_0001 |
| 146 | Small Terminase         | ASCC358_0001 |
| 147 | Small Terminase         | ASCC365_0001 |
| 148 | Small Terminase         | ASCC368_0001 |
| 149 | Small Terminase         | ASCC395_0001 |
| 150 | Small Terminase         | ASCC397_0001 |
| 151 | Small Terminase         | ASCC406_0001 |
| 152 | Small Terminase         | ASCC454_0001 |
| 153 | Small Terminase         | ASCC460_0001 |
| 154 | Small Terminase         | ASCC465_0001 |
| 155 | Small Terminase         | ASCC473_0001 |
| 156 | Small Terminase         | ASCC476_0001 |
| 157 | Small Terminase         | ASCC489_0001 |
| 158 | Small Terminase         | ASCC497_0001 |
| 159 | Small Terminase         | ASCC502_0001 |
| 160 | Small Terminase         | ASCC506_0001 |
| 161 | Small Terminase         | ASCC527_0001 |
| 162 | Small Terminase         | ASCC531_0001 |
| 163 | Small Terminase         | ASCC532_0001 |
| 164 | Small Terminase         | ASCC544_0001 |
| 165 | Small Terminase         | CB13_0001    |
| 166 | Small Terminase         | CB14_0001    |
| 167 | Small Terminase         | CB19_0001    |
| 168 | Small Terminase         | CB20_0001    |
| 169 | Small Terminase         | LPPV008_gp01 |
| 170 | Small Terminase         | LPV712_gp001 |
| 171 | Small Terminase         | P113G_001    |
| 172 | Small Terminase         | P272_001     |
| 173 | Small Terminase         | P475_001     |
| 174 | Small Terminase         | P680_01      |
| 175 | Small Terminase         | PastusJM3_01 |
| 176 | Small Terminase         | Phi10.5_01   |
| 177 | Small Terminase         | Phi109_01    |
| 178 | Small Terminase         | Phi114_01    |
| 179 | Small Terminase         | Phi129_01    |
| 180 | Small Terminase         | Phi1316_01   |
| 181 | Small Terminase         | Phi145_01    |

|     |                 |                 |
|-----|-----------------|-----------------|
| 182 | Small Terminase | Phi155_01       |
| 183 | Small Terminase | Phi15_01        |
| 184 | Small Terminase | Phi16_01        |
| 185 | Small Terminase | Phi17_01        |
| 186 | Small Terminase | Phi19.2_01      |
| 187 | Small Terminase | Phi19.3_01      |
| 188 | Small Terminase | Phi19_01        |
| 189 | Small Terminase | Phi4.2_01       |
| 190 | Small Terminase | Phi40_01        |
| 191 | Small Terminase | Phi43_01        |
| 192 | Small Terminase | Phi44_01        |
| 193 | Small Terminase | Phi4_01         |
| 194 | Small Terminase | Phi5.12_01      |
| 195 | Small Terminase | Phi91127_01     |
| 196 | Small Terminase | Phi93_01        |
| 197 | Small Terminase | PhiA1127_01     |
| 198 | Small Terminase | PhiA16_01       |
| 199 | Small Terminase | PhiB1127_01     |
| 200 | Small Terminase | PhiC0139_01     |
| 201 | Small Terminase | PhiD.18_01      |
| 202 | Small Terminase | PhiE1127_01     |
| 203 | Small Terminase | PhiF.17_01      |
| 204 | Small Terminase | PhiF0139_01     |
| 205 | Small Terminase | PhiG_01         |
| 206 | Small Terminase | PhiJF1_01       |
| 207 | Small Terminase | PhiL.18_01      |
| 208 | Small Terminase | PhiL.6_01       |
| 209 | Small Terminase | PhiLj_01        |
| 210 | Small Terminase | PhiM.16_01      |
| 211 | Small Terminase | PhiM.5_01       |
| 212 | Small Terminase | PhiM1127_01     |
| 213 | Small Terminase | PhiS0139_01     |
| 214 | Small Terminase | SL4_0001        |
| 215 | Small Terminase | ViridisJM2_gp01 |
| 216 | Small Terminase | bIBB29_gp01     |
| 217 | Small Terminase | bIL170p01       |
| 218 | Small Terminase | fd13_001        |
| 219 | Small Terminase | jj50_ORF1       |
| 220 | Small Terminase | jm1_0001        |
| 221 | Small Terminase | p2_0001         |
| 222 | Small Terminase | phi7_01         |
| 223 | Small Terminase | sk1p01          |
| 224 | Large terminase | 340_002         |
| 225 | Large terminase | 645_002         |
| 226 | Large terminase | 936_002         |
| 227 | Large terminase | ASCC191_0003    |
| 228 | Large terminase | ASCC273_0003    |
| 229 | Large terminase | ASCC281_0004    |
| 230 | Large terminase | ASCC284_0004    |
| 231 | Large terminase | ASCC287_0003    |



|     |                 |              |
|-----|-----------------|--------------|
| 232 | Large terminase | ASCC310_0004 |
| 233 | Large terminase | ASCC324_0003 |
| 234 | Large terminase | ASCC337_0003 |
| 235 | Large terminase | ASCC356_0004 |
| 236 | Large terminase | ASCC358_0004 |
| 237 | Large terminase | ASCC365_0004 |
| 238 | Large terminase | ASCC368_0003 |
| 239 | Large terminase | ASCC395_0003 |
| 240 | Large terminase | ASCC397_0003 |
| 241 | Large terminase | ASCC406_0003 |
| 242 | Large terminase | ASCC454_0003 |
| 243 | Large terminase | ASCC460_0003 |
| 244 | Large terminase | ASCC465_0004 |
| 245 | Large terminase | ASCC473_0004 |
| 246 | Large terminase | ASCC476_0003 |
| 247 | Large terminase | ASCC489_0004 |
| 248 | Large terminase | ASCC497_0004 |
| 249 | Large terminase | ASCC502_0003 |
| 250 | Large terminase | ASCC506_0003 |
| 251 | Large terminase | ASCC527_0003 |
| 252 | Large terminase | ASCC531_0004 |
| 253 | Large terminase | ASCC532_0004 |
| 254 | Large terminase | ASCC544_0003 |
| 255 | Large terminase | CB13_0003    |
| 256 | Large terminase | CB14_0003    |
| 257 | Large terminase | CB19_0003    |
| 258 | Large terminase | CB20_0003    |
| 259 | Large terminase | LPPV008_gp02 |
| 260 | Large terminase | LPV712_gp002 |
| 261 | Large terminase | P113G_002    |
| 262 | Large terminase | P272_002     |
| 263 | Large terminase | P475_002     |
| 264 | Large terminase | P680_02      |
| 265 | Large terminase | PastusJM3_02 |
| 266 | Large terminase | Phi10.5_03   |
| 267 | Large terminase | Phi109_04    |
| 268 | Large terminase | Phi114_03    |
| 269 | Large terminase | Phi129_02    |
| 270 | Large terminase | Phi1316_02   |
| 271 | Large terminase | Phi145_03    |
| 272 | Large terminase | Phi155_04    |
| 273 | Large terminase | Phi15_03     |
| 274 | Large terminase | Phi16_04     |
| 275 | Large terminase | Phi17_04     |
| 276 | Large terminase | Phi19.2_02   |
| 277 | Large terminase | Phi19.3_02   |
| 278 | Large terminase | Phi19_02     |
| 279 | Large terminase | Phi4.2_03    |
| 280 | Large terminase | Phi40_04     |
| 281 | Large terminase | Phi43_02     |

|     |                  |                 |
|-----|------------------|-----------------|
| 282 | Large terminase  | Phi44_03        |
| 283 | Large terminase  | Phi4_02         |
| 284 | Large terminase  | Phi5.12_03      |
| 285 | Large terminase  | Phi91127_04     |
| 286 | Large terminase  | Phi93_05        |
| 287 | Large terminase  | PhiA1127_03     |
| 288 | Large terminase  | PhiA16_02       |
| 289 | Large terminase  | PhiB1127_02     |
| 290 | Large terminase  | PhiC0139_02     |
| 291 | Large terminase  | PhiD.18_02      |
| 292 | Large terminase  | PhiE1127_03     |
| 293 | Large terminase  | PhiF.17_03      |
| 294 | Large terminase  | PhiF0139_03     |
| 295 | Large terminase  | PhiG_03         |
| 296 | Large terminase  | PhiJF1_03       |
| 297 | Large terminase  | PhiL.18_04      |
| 298 | Large terminase  | PhiL.6_04       |
| 299 | Large terminase  | PhiLj_02        |
| 300 | Large terminase  | PhiM.16_04      |
| 301 | Large terminase  | PhiM.5_04       |
| 302 | Large terminase  | PhiM1127_05     |
| 303 | Large terminase  | PhiS0139_02     |
| 304 | Large terminase  | SL4_0003        |
| 305 | Large terminase  | ViridisJM2_gp02 |
| 306 | Large terminase  | bIBB29_gp02     |
| 307 | Large terminase  | bIL170p02       |
| 308 | Large terminase  | fd13_002        |
| 309 | Large terminase  | jj50_ORF2       |
| 310 | Large terminase  | jm1_0002        |
| 311 | Large terminase  | p2_0002         |
| 312 | Large terminase  | phi7_02         |
| 313 | Large terminase  | sk1p02          |
| 314 | HNH Endonuclease | 340_003         |
| 315 | HNH Endonuclease | 645_003         |
| 316 | HNH Endonuclease | 936_003         |
| 317 | HNH Endonuclease | ASCC191_0004    |
| 318 | HNH Endonuclease | ASCC273_0004    |
| 319 | HNH Endonuclease | ASCC281_0005    |
| 320 | HNH Endonuclease | ASCC284_0005    |
| 321 | HNH Endonuclease | ASCC287_0004    |
| 322 | HNH Endonuclease | ASCC310_0005    |
| 323 | HNH Endonuclease | ASCC324_0004    |
| 324 | HNH Endonuclease | ASCC337_0004    |
| 325 | HNH Endonuclease | ASCC356_0005    |
| 326 | HNH Endonuclease | ASCC358_0005    |
| 327 | HNH Endonuclease | ASCC365_0005    |
| 328 | HNH Endonuclease | ASCC368_0004    |
| 329 | HNH Endonuclease | ASCC395_0004    |
| 330 | HNH Endonuclease | ASCC397_0004    |
| 331 | HNH Endonuclease | ASCC406_0004    |

|     |                  |              |
|-----|------------------|--------------|
| 332 | HNH Endonuclease | ASCC454_0004 |
| 333 | HNH Endonuclease | ASCC460_0004 |
| 334 | HNH Endonuclease | ASCC465_0005 |
| 335 | HNH Endonuclease | ASCC473_0005 |
| 336 | HNH Endonuclease | ASCC476_0004 |
| 337 | HNH Endonuclease | ASCC489_0005 |
| 338 | HNH Endonuclease | ASCC497_0005 |
| 339 | HNH Endonuclease | ASCC502_0004 |
| 340 | HNH Endonuclease | ASCC506_0004 |
| 341 | HNH Endonuclease | ASCC527_0004 |
| 342 | HNH Endonuclease | ASCC531_0005 |
| 343 | HNH Endonuclease | ASCC532_0005 |
| 344 | HNH Endonuclease | ASCC544_0004 |
| 345 | HNH Endonuclease | CB13_0004    |
| 346 | HNH Endonuclease | CB14_0004    |
| 347 | HNH Endonuclease | CB19_0004    |
| 348 | HNH Endonuclease | CB20_0004    |
| 349 | HNH Endonuclease | LPPV008_gp03 |
| 350 | HNH Endonuclease | LPV712_gp003 |
| 351 | HNH Endonuclease | P113G_003    |
| 352 | HNH Endonuclease | P272_003     |
| 353 | HNH Endonuclease | P475_003     |
| 354 | HNH Endonuclease | P680_03      |
| 355 | HNH Endonuclease | PastusJM3_03 |
| 356 | HNH Endonuclease | Phi10.5_04   |
| 357 | HNH Endonuclease | Phi109_05    |
| 358 | HNH Endonuclease | Phi114_04    |
| 359 | HNH Endonuclease | Phi129_03    |
| 360 | HNH Endonuclease | Phi1316_03   |
| 361 | HNH Endonuclease | Phi145_04    |
| 362 | HNH Endonuclease | Phi155_05    |
| 363 | HNH Endonuclease | Phi15_04     |
| 364 | HNH Endonuclease | Phi16_05     |
| 365 | HNH Endonuclease | Phi17_05     |
| 366 | HNH Endonuclease | Phi19.2_03   |
| 367 | HNH Endonuclease | Phi19.3_03   |
| 368 | HNH Endonuclease | Phi19_03     |
| 369 | HNH Endonuclease | Phi4.2_04    |
| 370 | HNH Endonuclease | Phi40_05     |
| 371 | HNH Endonuclease | Phi43_03     |
| 372 | HNH Endonuclease | Phi44_04     |
| 373 | HNH Endonuclease | Phi4_03      |
| 374 | HNH Endonuclease | Phi5.12_04   |
| 375 | HNH Endonuclease | Phi91127_05  |
| 376 | HNH Endonuclease | Phi93_06     |
| 377 | HNH Endonuclease | PhiA1127_04  |
| 378 | HNH Endonuclease | PhiA16_03    |
| 379 | HNH Endonuclease | PhiB1127_03  |
| 380 | HNH Endonuclease | PhiC0139_03  |
| 381 | HNH Endonuclease | PhiD.18_03   |

382 HNH Endonuclease PhiE1127\_04  
383 HNH Endonuclease PhiF.17\_04  
384 HNH Endonuclease PhiF0139\_04  
385 HNH Endonuclease PhiG\_04  
386 HNH Endonuclease PhiJF1\_04  
387 HNH Endonuclease PhiL.18\_05  
388 HNH Endonuclease PhiL.6\_05  
389 HNH Endonuclease PhiLj\_03  
390 HNH Endonuclease PhiM.16\_05  
391 HNH Endonuclease PhiM.5\_05  
392 HNH Endonuclease PhiM1127\_06  
393 HNH Endonuclease PhiS0139\_03  
394 HNH Endonuclease SL4\_0004  
395 HNH Endonuclease ViridisJM2\_gp03  
396 HNH Endonuclease bIBB29\_gp03  
397 HNH Endonuclease bIL170p03  
398 HNH Endonuclease fd13\_003  
399 HNH Endonuclease jj50\_ORF3  
400 HNH Endonuclease jm1\_0003  
401 HNH Endonuclease p2\_0003  
402 HNH Endonuclease phi7\_03  
403 HNH Endonuclease sk1p03  
404 Portal 340\_004  
405 Portal 645\_004  
406 Portal 936\_004  
407 Portal ASCC191\_0005  
408 Portal ASCC273\_0005  
409 Portal ASCC281\_0006  
410 Portal ASCC284\_0006  
411 Portal ASCC287\_0005  
412 Portal ASCC310\_0006  
413 Portal ASCC324\_0005  
414 Portal ASCC337\_0005  
415 Portal ASCC356\_0006  
416 Portal ASCC358\_0006  
417 Portal ASCC365\_0006  
418 Portal ASCC368\_0005  
419 Portal ASCC395\_0005  
420 Portal ASCC397\_0005  
421 Portal ASCC406\_0005  
422 Portal ASCC454\_0005  
423 Portal ASCC460\_0005  
424 Portal ASCC465\_0006  
425 Portal ASCC473\_0006  
426 Portal ASCC476\_0005  
427 Portal ASCC489\_0006  
428 Portal ASCC497\_0006  
429 Portal ASCC502\_0005  
430 Portal ASCC506\_0005  
431 Portal ASCC527\_0005

432 Portal ASCC531\_0006  
433 Portal ASCC532\_0006  
434 Portal ASCC544\_0005  
435 Portal CB13\_0005  
436 Portal CB14\_0005  
437 Portal CB19\_0005  
438 Portal CB20\_0005  
439 Portal LPPV008\_gp04  
440 Portal LPV712\_gp004  
441 Portal P113G\_004  
442 Portal P272\_004  
443 Portal P475\_004  
444 Portal P680\_04  
445 Portal PastusJM3\_04  
446 Portal Phi10.5\_05  
447 Portal Phi109\_06  
448 Portal Phi114\_05  
449 Portal Phi129\_04  
450 Portal Phi1316\_04  
451 Portal Phi145\_05  
452 Portal Phi155\_06  
453 Portal Phi15\_05  
454 Portal Phi16\_06  
455 Portal Phi17\_06  
456 Portal Phi19.2\_04  
457 Portal Phi19.3\_04  
458 Portal Phi19\_04  
459 Portal Phi4.2\_05  
460 Portal Phi40\_06  
461 Portal Phi43\_04  
462 Portal Phi44\_05  
463 Portal Phi4\_04  
464 Portal Phi5.12\_05  
465 Portal Phi91127\_06  
466 Portal Phi93\_07  
467 Portal PhiA1127\_05  
468 Portal PhiA16\_04  
469 Portal PhiB1127\_04  
470 Portal PhiC0139\_04  
471 Portal PhiD.18\_04  
472 Portal PhiE1127\_05  
473 Portal PhiF.17\_05  
474 Portal PhiF0139\_05  
475 Portal PhiG\_05  
476 Portal PhiJF1\_05  
477 Portal PhiL.18\_06  
478 Portal PhiL.6\_06  
479 Portal PhiLj\_04  
480 Portal PhiM.16\_06  
481 Portal PhiM.5\_06

482 Portal PhiM1127\_07  
483 Portal PhiS0139\_04  
484 Portal SL4\_0005  
485 Portal ViridisJM2\_gp04  
486 Portal bIBB29\_gp04  
487 Portal bIL170p04  
488 Portal fd13\_004  
489 Portal jj50\_ORF4  
490 Portal jm1\_0004  
491 Portal p2\_0004  
492 Portal phi7\_04  
493 Portal sk1p04  
494 Protease 340\_005  
495 Protease 645\_005  
496 Protease 936\_005  
497 Protease ASCC191\_0006  
498 Protease ASCC273\_0006  
499 Protease ASCC281\_0007  
500 Protease ASCC284\_0007  
501 Protease ASCC287\_0006  
502 Protease ASCC310\_0007  
503 Protease ASCC324\_0006  
504 Protease ASCC337\_0006  
505 Protease ASCC356\_0007  
506 Protease ASCC358\_0007  
507 Protease ASCC365\_0007  
508 Protease ASCC368\_0006  
509 Protease ASCC395\_0006  
510 Protease ASCC397\_0006  
511 Protease ASCC406\_0006  
512 Protease ASCC454\_0006  
513 Protease ASCC460\_0006  
514 Protease ASCC465\_0007  
515 Protease ASCC473\_0007  
516 Protease ASCC476\_0006  
517 Protease ASCC489\_0007  
518 Protease ASCC497\_0007  
519 Protease ASCC502\_0006  
520 Protease ASCC506\_0006  
521 Protease ASCC527\_0006  
522 Protease ASCC531\_0007  
523 Protease ASCC532\_0007  
524 Protease ASCC544\_0006  
525 Protease CB13\_0006  
526 Protease CB14\_0006  
527 Protease CB19\_0006  
528 Protease CB20\_0006  
529 Protease LPPV008\_gp05  
530 Protease LPV712\_gp005  
531 Protease P113G\_005

|     |          |                 |
|-----|----------|-----------------|
| 532 | Protease | P272_005        |
| 533 | Protease | P475_005        |
| 534 | Protease | P680_05         |
| 535 | Protease | PastusJM3_05    |
| 536 | Protease | Phi10.5_06      |
| 537 | Protease | Phi109_07       |
| 538 | Protease | Phi114_06       |
| 539 | Protease | Phi129_05       |
| 540 | Protease | Phi1316_05      |
| 541 | Protease | Phi145_06       |
| 542 | Protease | Phi155_07       |
| 543 | Protease | Phi15_06        |
| 544 | Protease | Phi16_07        |
| 545 | Protease | Phi17_07        |
| 546 | Protease | Phi19.2_05      |
| 547 | Protease | Phi19.3_05      |
| 548 | Protease | Phi19_05        |
| 549 | Protease | Phi4.2_06       |
| 550 | Protease | Phi40_07        |
| 551 | Protease | Phi43_05        |
| 552 | Protease | Phi44_06        |
| 553 | Protease | Phi4_05         |
| 554 | Protease | Phi5.12_06      |
| 555 | Protease | Phi91127_07     |
| 556 | Protease | Phi93_08        |
| 557 | Protease | PhiA1127_06     |
| 558 | Protease | PhiA16_05       |
| 559 | Protease | PhiB1127_05     |
| 560 | Protease | PhiC0139_05     |
| 561 | Protease | PhiD.18_05      |
| 562 | Protease | PhiE1127_06     |
| 563 | Protease | PhiF.17_06      |
| 564 | Protease | PhiF0139_06     |
| 565 | Protease | PhiG_06         |
| 566 | Protease | PhiJF1_06       |
| 567 | Protease | PhiL.18_07      |
| 568 | Protease | PhiL.6_07       |
| 569 | Protease | PhiLj_05        |
| 570 | Protease | PhiM.16_07      |
| 571 | Protease | PhiM.5_07       |
| 572 | Protease | PhiM1127_08     |
| 573 | Protease | PhiS0139_05     |
| 574 | Protease | SL4_0006        |
| 575 | Protease | ViridisJM2_gp05 |
| 576 | Protease | bIBB29_gp05     |
| 577 | Protease | bIL170p05       |
| 578 | Protease | fd13_005        |
| 579 | Protease | jj50_ORF5       |
| 580 | Protease | jm1_0005        |
| 581 | Protease | p2_0005         |

|     |                      |              |
|-----|----------------------|--------------|
| 582 | Protease             | phi7_05      |
| 583 | Protease             | sk1p05       |
| 584 | Major capsid protein | 340_007      |
| 585 | Major capsid protein | 645_006      |
| 586 | Major capsid protein | 936_006      |
| 587 | Major capsid protein | ASCC191_0007 |
| 588 | Major capsid protein | ASCC273_0007 |
| 589 | Major capsid protein | ASCC281_0008 |
| 590 | Major capsid protein | ASCC284_0008 |
| 591 | Major capsid protein | ASCC287_0007 |
| 592 | Major capsid protein | ASCC310_0008 |
| 593 | Major capsid protein | ASCC324_0007 |
| 594 | Major capsid protein | ASCC337_0007 |
| 595 | Major capsid protein | ASCC356_0008 |
| 596 | Major capsid protein | ASCC358_0008 |
| 597 | Major capsid protein | ASCC365_0008 |
| 598 | Major capsid protein | ASCC368_0007 |
| 599 | Major capsid protein | ASCC395_0007 |
| 600 | Major capsid protein | ASCC397_0007 |
| 601 | Major capsid protein | ASCC406_0007 |
| 602 | Major capsid protein | ASCC454_0007 |
| 603 | Major capsid protein | ASCC460_0007 |
| 604 | Major capsid protein | ASCC465_0008 |
| 605 | Major capsid protein | ASCC473_0008 |
| 606 | Major capsid protein | ASCC476_0007 |
| 607 | Major capsid protein | ASCC489_0008 |
| 608 | Major capsid protein | ASCC497_0008 |
| 609 | Major capsid protein | ASCC502_0007 |
| 610 | Major capsid protein | ASCC506_0007 |
| 611 | Major capsid protein | ASCC527_0007 |
| 612 | Major capsid protein | ASCC531_0008 |
| 613 | Major capsid protein | ASCC532_0008 |
| 614 | Major capsid protein | ASCC544_0007 |
| 615 | Major capsid protein | CB13_0007    |
| 616 | Major capsid protein | CB14_0007    |
| 617 | Major capsid protein | CB19_0007    |
| 618 | Major capsid protein | CB20_0007    |
| 619 | Major capsid protein | LPPV008_gp06 |
| 620 | Major capsid protein | LPPV008_gp07 |
| 621 | Major capsid protein | LPV712_gp006 |
| 622 | Major capsid protein | P113G_006    |
| 623 | Major capsid protein | P272_006     |
| 624 | Major capsid protein | P475_006     |
| 625 | Major capsid protein | P680_06      |
| 626 | Major capsid protein | PastusJM3_06 |
| 627 | Major capsid protein | Phi10.5_07   |
| 628 | Major capsid protein | Phi109_08    |
| 629 | Major capsid protein | Phi114_07    |
| 630 | Major capsid protein | Phi129_06    |
| 631 | Major capsid protein | Phi1316_06   |



|     |                      |                 |
|-----|----------------------|-----------------|
| 632 | Major capsid protein | Phi145_07       |
| 633 | Major capsid protein | Phi155_08       |
| 634 | Major capsid protein | Phi15_07        |
| 635 | Major capsid protein | Phi16_08        |
| 636 | Major capsid protein | Phi17_08        |
| 637 | Major capsid protein | Phi19.2_06      |
| 638 | Major capsid protein | Phi19.3_06      |
| 639 | Major capsid protein | Phi19_06        |
| 640 | Major capsid protein | Phi4.2_07       |
| 641 | Major capsid protein | Phi40_08        |
| 642 | Major capsid protein | Phi43_06        |
| 643 | Major capsid protein | Phi44_07        |
| 644 | Major capsid protein | Phi4_06         |
| 645 | Major capsid protein | Phi5.12_07      |
| 646 | Major capsid protein | Phi91127_08     |
| 647 | Major capsid protein | Phi93_09        |
| 648 | Major capsid protein | PhiA1127_07     |
| 649 | Major capsid protein | PhiA16_06       |
| 650 | Major capsid protein | PhiB1127_06     |
| 651 | Major capsid protein | PhiC0139_06     |
| 652 | Major capsid protein | PhiD.18_06      |
| 653 | Major capsid protein | PhiE1127_07     |
| 654 | Major capsid protein | PhiF.17_07      |
| 655 | Major capsid protein | PhiF0139_07     |
| 656 | Major capsid protein | PhiG_07         |
| 657 | Major capsid protein | PhiJF1_07       |
| 658 | Major capsid protein | PhiL.18_08      |
| 659 | Major capsid protein | PhiL.6_08       |
| 660 | Major capsid protein | PhiLj_06        |
| 661 | Major capsid protein | PhiM.16_08      |
| 662 | Major capsid protein | PhiM.5_08       |
| 663 | Major capsid protein | PhiM1127_09     |
| 664 | Major capsid protein | PhiS0139_06     |
| 665 | Major capsid protein | SL4_0007        |
| 666 | Major capsid protein | ViridisJM2_gp06 |
| 667 | Major capsid protein | bIBB29_gp06     |
| 668 | Major capsid protein | bIL170p06       |
| 669 | Major capsid protein | bIL170p07       |
| 670 | Major capsid protein | fd13_006        |
| 671 | Major capsid protein | jj50_ORF6       |
| 672 | Major capsid protein | jm1_0006        |
| 673 | Major capsid protein | p2_0006         |
| 674 | Major capsid protein | phi7_06         |
| 675 | Major capsid protein | sk1p06          |
| 676 | Hypothetical protein | 340_008         |
| 677 | Hypothetical protein | 645_007         |
| 678 | Hypothetical protein | 936_007         |
| 679 | Hypothetical protein | ASCC191_0008    |
| 680 | Hypothetical protein | ASCC273_0008    |
| 681 | Hypothetical protein | ASCC281_0009    |

|     |                      |              |
|-----|----------------------|--------------|
| 682 | Hypothetical protein | ASCC284_0009 |
| 683 | Hypothetical protein | ASCC287_0008 |
| 684 | Hypothetical protein | ASCC310_0009 |
| 685 | Hypothetical protein | ASCC324_0008 |
| 686 | Hypothetical protein | ASCC337_0008 |
| 687 | Hypothetical protein | ASCC356_0009 |
| 688 | Hypothetical protein | ASCC358_0009 |
| 689 | Hypothetical protein | ASCC365_0009 |
| 690 | Hypothetical protein | ASCC368_0008 |
| 691 | Hypothetical protein | ASCC395_0008 |
| 692 | Hypothetical protein | ASCC397_0008 |
| 693 | Hypothetical protein | ASCC406_0008 |
| 694 | Hypothetical protein | ASCC454_0008 |
| 695 | Hypothetical protein | ASCC460_0008 |
| 696 | Hypothetical protein | ASCC465_0009 |
| 697 | Hypothetical protein | ASCC473_0009 |
| 698 | Hypothetical protein | ASCC476_0008 |
| 699 | Hypothetical protein | ASCC489_0009 |
| 700 | Hypothetical protein | ASCC497_0009 |
| 701 | Hypothetical protein | ASCC502_0008 |
| 702 | Hypothetical protein | ASCC506_0008 |
| 703 | Hypothetical protein | ASCC527_0008 |
| 704 | Hypothetical protein | ASCC531_0009 |
| 705 | Hypothetical protein | ASCC532_0009 |
| 706 | Hypothetical protein | ASCC544_0008 |
| 707 | Hypothetical protein | CB13_0008    |
| 708 | Hypothetical protein | CB14_0008    |
| 709 | Hypothetical protein | CB19_0008    |
| 710 | Hypothetical protein | CB20_0008    |
| 711 | Hypothetical protein | LPPV008_gp08 |
| 712 | Hypothetical protein | LPV712_gp007 |
| 713 | Hypothetical protein | P113G_007    |
| 714 | Hypothetical protein | P272_007     |
| 715 | Hypothetical protein | P475_007     |
| 716 | Hypothetical protein | P680_07      |
| 717 | Hypothetical protein | PastusJM3_07 |
| 718 | Hypothetical protein | Phi10.5_08   |
| 719 | Hypothetical protein | Phi109_09    |
| 720 | Hypothetical protein | Phi114_08    |
| 721 | Hypothetical protein | Phi129_07    |
| 722 | Hypothetical protein | Phi1316_07   |
| 723 | Hypothetical protein | Phi145_08    |
| 724 | Hypothetical protein | Phi155_09    |
| 725 | Hypothetical protein | Phi15_08     |
| 726 | Hypothetical protein | Phi16_09     |
| 727 | Hypothetical protein | Phi17_09     |
| 728 | Hypothetical protein | Phi19.2_07   |
| 729 | Hypothetical protein | Phi19.3_07   |
| 730 | Hypothetical protein | Phi19_07     |
| 731 | Hypothetical protein | Phi4.2_08    |

|     |                      |                 |
|-----|----------------------|-----------------|
| 732 | Hypothetical protein | Phi40_09        |
| 733 | Hypothetical protein | Phi43_07        |
| 734 | Hypothetical protein | Phi44_08        |
| 735 | Hypothetical protein | Phi4_07         |
| 736 | Hypothetical protein | Phi5.12_08      |
| 737 | Hypothetical protein | Phi91127_09     |
| 738 | Hypothetical protein | Phi93_10        |
| 739 | Hypothetical protein | PhiA1127_08     |
| 740 | Hypothetical protein | PhiA16_07       |
| 741 | Hypothetical protein | PhiB1127_07     |
| 742 | Hypothetical protein | PhiC0139_07     |
| 743 | Hypothetical protein | PhiD.18_07      |
| 744 | Hypothetical protein | PhiE1127_08     |
| 745 | Hypothetical protein | PhiF.17_08      |
| 746 | Hypothetical protein | PhiF0139_08     |
| 747 | Hypothetical protein | PhiG_08         |
| 748 | Hypothetical protein | PhiJF1_08       |
| 749 | Hypothetical protein | PhiL.18_09      |
| 750 | Hypothetical protein | PhiL.6_09       |
| 751 | Hypothetical protein | PhiLj_07        |
| 752 | Hypothetical protein | PhiM.16_09      |
| 753 | Hypothetical protein | PhiM.5_09       |
| 754 | Hypothetical protein | PhiM1127_10     |
| 755 | Hypothetical protein | PhiS0139_07     |
| 756 | Hypothetical protein | SL4_0008        |
| 757 | Hypothetical protein | ViridisJM2_gp07 |
| 758 | Hypothetical protein | bIBB29_gp07     |
| 759 | Hypothetical protein | bIL170p08       |
| 760 | Hypothetical protein | fd13_007        |
| 761 | Hypothetical protein | jj50_ORF7       |
| 762 | Hypothetical protein | jm1_0007        |
| 763 | Hypothetical protein | p2_0007         |
| 764 | Hypothetical protein | phi7_07         |
| 765 | Hypothetical protein | sk1p07          |
| 766 | Connector            | 340_009         |
| 767 | Connector            | 645_008         |
| 768 | Connector            | 936_008         |
| 769 | Connector            | ASCC191_0009    |
| 770 | Connector            | ASCC273_0009    |
| 771 | Connector            | ASCC281_0010    |
| 772 | Connector            | ASCC284_0010    |
| 773 | Connector            | ASCC287_0009    |
| 774 | Connector            | ASCC310_0010    |
| 775 | Connector            | ASCC324_0009    |
| 776 | Connector            | ASCC337_0009    |
| 777 | Connector            | ASCC356_0010    |
| 778 | Connector            | ASCC358_0010    |
| 779 | Connector            | ASCC365_0010    |
| 780 | Connector            | ASCC368_0009    |
| 781 | Connector            | ASCC395_0009    |

|     |           |              |
|-----|-----------|--------------|
| 782 | Connector | ASCC397_0009 |
| 783 | Connector | ASCC406_0009 |
| 784 | Connector | ASCC454_0009 |
| 785 | Connector | ASCC460_0009 |
| 786 | Connector | ASCC465_0010 |
| 787 | Connector | ASCC473_0010 |
| 788 | Connector | ASCC476_0009 |
| 789 | Connector | ASCC489_0010 |
| 790 | Connector | ASCC497_0010 |
| 791 | Connector | ASCC502_0009 |
| 792 | Connector | ASCC506_0009 |
| 793 | Connector | ASCC527_0009 |
| 794 | Connector | ASCC531_0010 |
| 795 | Connector | ASCC532_0010 |
| 796 | Connector | ASCC544_0009 |
| 797 | Connector | CB13_0009    |
| 798 | Connector | CB14_0009    |
| 799 | Connector | CB19_0009    |
| 800 | Connector | CB20_0009    |
| 801 | Connector | LPPV008_gp09 |
| 802 | Connector | LPV712_gp008 |
| 803 | Connector | P113G_008    |
| 804 | Connector | P272_008     |
| 805 | Connector | P475_008     |
| 806 | Connector | P680_08      |
| 807 | Connector | PastusJM3_08 |
| 808 | Connector | Phi10.5_09   |
| 809 | Connector | Phi109_10    |
| 810 | Connector | Phi114_09    |
| 811 | Connector | Phi129_08    |
| 812 | Connector | Phi1316_08   |
| 813 | Connector | Phi145_09    |
| 814 | Connector | Phi155_10    |
| 815 | Connector | Phi15_09     |
| 816 | Connector | Phi16_10     |
| 817 | Connector | Phi17_10     |
| 818 | Connector | Phi19.2_08   |
| 819 | Connector | Phi19.3_08   |
| 820 | Connector | Phi19_08     |
| 821 | Connector | Phi4.2_09    |
| 822 | Connector | Phi40_10     |
| 823 | Connector | Phi43_08     |
| 824 | Connector | Phi44_09     |
| 825 | Connector | Phi4_08      |
| 826 | Connector | Phi5.12_09   |
| 827 | Connector | Phi91127_10  |
| 828 | Connector | Phi93_11     |
| 829 | Connector | PhiA1127_09  |
| 830 | Connector | PhiA16_08    |
| 831 | Connector | PhiB1127_08  |

|     |           |                 |
|-----|-----------|-----------------|
| 832 | Connector | PhiC0139_08     |
| 833 | Connector | PhiD.18_08      |
| 834 | Connector | PhiE1127_09     |
| 835 | Connector | PhiF.17_09      |
| 836 | Connector | PhiF0139_09     |
| 837 | Connector | PhiG_09         |
| 838 | Connector | PhiJF1_09       |
| 839 | Connector | PhiL.18_10      |
| 840 | Connector | PhiL.6_10       |
| 841 | Connector | PhiLj_08        |
| 842 | Connector | PhiM.16_10      |
| 843 | Connector | PhiM.5_10       |
| 844 | Connector | PhiM1127_11     |
| 845 | Connector | PhiS0139_08     |
| 846 | Connector | SL4_0009        |
| 847 | Connector | ViridisJM2_gp08 |
| 848 | Connector | bIBB29_gp08     |
| 849 | Connector | bIL170p09       |
| 850 | Connector | fd13_008        |
| 851 | Connector | jj50_ORF8       |
| 852 | Connector | jm1_0008        |
| 853 | Connector | p2_0008         |
| 854 | Connector | phi7_08         |
| 855 | Connector | sk1p08          |
| 856 | Stopper   | 340_0010        |
| 857 | Stopper   | 645_009         |
| 858 | Stopper   | 936_009         |
| 859 | Stopper   | ASCC191_0010    |
| 860 | Stopper   | ASCC191_0013    |
| 861 | Stopper   | ASCC273_0010    |
| 862 | Stopper   | ASCC273_0013    |
| 863 | Stopper   | ASCC281_0011    |
| 864 | Stopper   | ASCC284_0011    |
| 865 | Stopper   | ASCC287_0010    |
| 866 | Stopper   | ASCC287_0013    |
| 867 | Stopper   | ASCC310_0011    |
| 868 | Stopper   | ASCC324_0010    |
| 869 | Stopper   | ASCC324_0013    |
| 870 | Stopper   | ASCC337_0010    |
| 871 | Stopper   | ASCC337_0013    |
| 872 | Stopper   | ASCC356_0011    |
| 873 | Stopper   | ASCC358_0011    |
| 874 | Stopper   | ASCC365_0011    |
| 875 | Stopper   | ASCC368_0010    |
| 876 | Stopper   | ASCC368_0013    |
| 877 | Stopper   | ASCC395_0010    |
| 878 | Stopper   | ASCC395_0013    |
| 879 | Stopper   | ASCC397_0010    |
| 880 | Stopper   | ASCC397_0013    |
| 881 | Stopper   | ASCC406_0010    |

|     |         |              |
|-----|---------|--------------|
| 882 | Stopper | ASCC406_0013 |
| 883 | Stopper | ASCC454_0010 |
| 884 | Stopper | ASCC454_0013 |
| 885 | Stopper | ASCC460_0010 |
| 886 | Stopper | ASCC460_0013 |
| 887 | Stopper | ASCC465_0011 |
| 888 | Stopper | ASCC473_0011 |
| 889 | Stopper | ASCC476_0010 |
| 890 | Stopper | ASCC476_0013 |
| 891 | Stopper | ASCC489_0011 |
| 892 | Stopper | ASCC497_0011 |
| 893 | Stopper | ASCC502_0010 |
| 894 | Stopper | ASCC502_0013 |
| 895 | Stopper | ASCC506_0010 |
| 896 | Stopper | ASCC506_0013 |
| 897 | Stopper | ASCC527_0010 |
| 898 | Stopper | ASCC527_0013 |
| 899 | Stopper | ASCC531_0011 |
| 900 | Stopper | ASCC532_0011 |
| 901 | Stopper | ASCC544_0010 |
| 902 | Stopper | ASCC544_0013 |
| 903 | Stopper | CB13_0010    |
| 904 | Stopper | CB14_0010    |
| 905 | Stopper | CB19_0010    |
| 906 | Stopper | CB20_0010    |
| 907 | Stopper | LPPV008_gp10 |
| 908 | Stopper | LPV712_gp009 |
| 909 | Stopper | P113G_009    |
| 910 | Stopper | P272_009     |
| 911 | Stopper | P475_0010    |
| 912 | Stopper | P680_09      |
| 913 | Stopper | PastusJM3_09 |
| 914 | Stopper | Phi10.5_11   |
| 915 | Stopper | Phi109_12    |
| 916 | Stopper | Phi114_10    |
| 917 | Stopper | Phi129_09    |
| 918 | Stopper | Phi1316_09   |
| 919 | Stopper | Phi145_11    |
| 920 | Stopper | Phi155_11    |
| 921 | Stopper | Phi15_10     |
| 922 | Stopper | Phi16_12     |
| 923 | Stopper | Phi17_11     |
| 924 | Stopper | Phi19.2_09   |
| 925 | Stopper | Phi19.3_09   |
| 926 | Stopper | Phi19_09     |
| 927 | Stopper | Phi4.2_10    |
| 928 | Stopper | Phi40_12     |
| 929 | Stopper | Phi43_09     |
| 930 | Stopper | Phi44_10     |
| 931 | Stopper | Phi4_10      |

|     |                 |                 |
|-----|-----------------|-----------------|
| 932 | Stopper         | Phi5.12_10      |
| 933 | Stopper         | Phi91127_11     |
| 934 | Stopper         | Phi93_13        |
| 935 | Stopper         | PhiA1127_10     |
| 936 | Stopper         | PhiA16_09       |
| 937 | Stopper         | PhiB1127_09     |
| 938 | Stopper         | PhiC0139_09     |
| 939 | Stopper         | PhiD.18_09      |
| 940 | Stopper         | PhiE1127_10     |
| 941 | Stopper         | PhiF.17_10      |
| 942 | Stopper         | PhiF0139_10     |
| 943 | Stopper         | PhiG_10         |
| 944 | Stopper         | PhiJF1_11       |
| 945 | Stopper         | PhiL.18_11      |
| 946 | Stopper         | PhiL.6_11       |
| 947 | Stopper         | PhiLj_09        |
| 948 | Stopper         | PhiM.16_11      |
| 949 | Stopper         | PhiM.5_11       |
| 950 | Stopper         | PhiM1127_12     |
| 951 | Stopper         | PhiS0139_09     |
| 952 | Stopper         | SL4_0011        |
| 953 | Stopper         | ViridisJM2_gp09 |
| 954 | Stopper         | bIBB29_gp09     |
| 955 | Stopper         | bIL170p10       |
| 956 | Stopper         | fd13_0010       |
| 957 | Stopper         | jj50_ORF9       |
| 958 | Stopper         | jm1_0009        |
| 959 | Stopper         | p2_0009         |
| 960 | Stopper         | phi7_09         |
| 961 | Stopper         | sk1p09          |
| 962 | Tail terminator | 340_0011        |
| 963 | Tail terminator | 645_0010        |
| 964 | Tail terminator | 936_0010        |
| 965 | Tail terminator | ASCC191_0011    |
| 966 | Tail terminator | ASCC273_0011    |
| 967 | Tail terminator | ASCC281_0012    |
| 968 | Tail terminator | ASCC284_0012    |
| 969 | Tail terminator | ASCC287_0011    |
| 970 | Tail terminator | ASCC310_0012    |
| 971 | Tail terminator | ASCC324_0011    |
| 972 | Tail terminator | ASCC337_0011    |
| 973 | Tail terminator | ASCC356_0012    |
| 974 | Tail terminator | ASCC358_0012    |
| 975 | Tail terminator | ASCC365_0012    |
| 976 | Tail terminator | ASCC368_0011    |
| 977 | Tail terminator | ASCC395_0011    |
| 978 | Tail terminator | ASCC397_0011    |
| 979 | Tail terminator | ASCC406_0011    |
| 980 | Tail terminator | ASCC454_0011    |
| 981 | Tail terminator | ASCC460_0011    |

|      |                 |              |
|------|-----------------|--------------|
| 982  | Tail terminator | ASCC465_0012 |
| 983  | Tail terminator | ASCC473_0012 |
| 984  | Tail terminator | ASCC476_0011 |
| 985  | Tail terminator | ASCC489_0012 |
| 986  | Tail terminator | ASCC497_0012 |
| 987  | Tail terminator | ASCC502_0011 |
| 988  | Tail terminator | ASCC506_0011 |
| 989  | Tail terminator | ASCC527_0011 |
| 990  | Tail terminator | ASCC531_0012 |
| 991  | Tail terminator | ASCC532_0012 |
| 992  | Tail terminator | ASCC544_0011 |
| 993  | Tail terminator | CB13_0011    |
| 994  | Tail terminator | CB14_0011    |
| 995  | Tail terminator | CB19_0011    |
| 996  | Tail terminator | CB20_0011    |
| 997  | Tail terminator | LPPV008_gp11 |
| 998  | Tail terminator | LPV712_gp010 |
| 999  | Tail terminator | P113G_0010   |
| 1000 | Tail terminator | P272_0010    |
| 1001 | Tail terminator | P475_0011    |
| 1002 | Tail terminator | P680_10      |
| 1003 | Tail terminator | PastusJM3_10 |
| 1004 | Tail terminator | Phi10.5_12   |
| 1005 | Tail terminator | Phi109_13    |
| 1006 | Tail terminator | Phi114_11    |
| 1007 | Tail terminator | Phi129_10    |
| 1008 | Tail terminator | Phi1316_10   |
| 1009 | Tail terminator | Phi145_12    |
| 1010 | Tail terminator | Phi155_12    |
| 1011 | Tail terminator | Phi15_11     |
| 1012 | Tail terminator | Phi16_13     |
| 1013 | Tail terminator | Phi17_12     |
| 1014 | Tail terminator | Phi19.2_10   |
| 1015 | Tail terminator | Phi19.3_10   |
| 1016 | Tail terminator | Phi19_10     |
| 1017 | Tail terminator | Phi4.2_11    |
| 1018 | Tail terminator | Phi40_13     |
| 1019 | Tail terminator | Phi43_10     |
| 1020 | Tail terminator | Phi44_11     |
| 1021 | Tail terminator | Phi4_11      |
| 1022 | Tail terminator | Phi5.12_11   |
| 1023 | Tail terminator | Phi91127_12  |
| 1024 | Tail terminator | Phi93_14     |
| 1025 | Tail terminator | PhiA1127_11  |
| 1026 | Tail terminator | PhiA16_10    |
| 1027 | Tail terminator | PhiB1127_10  |
| 1028 | Tail terminator | PhiC0139_10  |
| 1029 | Tail terminator | PhiD.18_10   |
| 1030 | Tail terminator | PhiE1127_11  |
| 1031 | Tail terminator | PhiF.17_11   |



|      |                    |                 |
|------|--------------------|-----------------|
| 1032 | Tail terminator    | PhiF0139_11     |
| 1033 | Tail terminator    | PhiG_11         |
| 1034 | Tail terminator    | PhiJF1_12       |
| 1035 | Tail terminator    | PhiL.18_12      |
| 1036 | Tail terminator    | PhiL.6_12       |
| 1037 | Tail terminator    | PhiLj_10        |
| 1038 | Tail terminator    | PhiM.16_12      |
| 1039 | Tail terminator    | PhiM.5_12       |
| 1040 | Tail terminator    | PhiM1127_13     |
| 1041 | Tail terminator    | PhiS0139_10     |
| 1042 | Tail terminator    | SL4_0012        |
| 1043 | Tail terminator    | ViridisJM2_gp10 |
| 1044 | Tail terminator    | bIBB29_gp10     |
| 1045 | Tail terminator    | bIL170p11       |
| 1046 | Tail terminator    | fd13_0011       |
| 1047 | Tail terminator    | jj50_ORF10      |
| 1048 | Tail terminator    | jm1_0010        |
| 1049 | Tail terminator    | p2_0010         |
| 1050 | Tail terminator    | phi7_10         |
| 1051 | Tail terminator    | sk1p10          |
| 1052 | Major tail protein | 340_0013        |
| 1053 | Major tail protein | 645_0012        |
| 1054 | Major tail protein | 936_0011        |
| 1055 | Major tail protein | ASCC191_0014    |
| 1056 | Major tail protein | ASCC273_0014    |
| 1057 | Major tail protein | ASCC281_0014    |
| 1058 | Major tail protein | ASCC284_0014    |
| 1059 | Major tail protein | ASCC287_0014    |
| 1060 | Major tail protein | ASCC310_0014    |
| 1061 | Major tail protein | ASCC324_0014    |
| 1062 | Major tail protein | ASCC337_0014    |
| 1063 | Major tail protein | ASCC356_0014    |
| 1064 | Major tail protein | ASCC358_0014    |
| 1065 | Major tail protein | ASCC365_0014    |
| 1066 | Major tail protein | ASCC368_0014    |
| 1067 | Major tail protein | ASCC395_0014    |
| 1068 | Major tail protein | ASCC397_0014    |
| 1069 | Major tail protein | ASCC406_0014    |
| 1070 | Major tail protein | ASCC454_0014    |
| 1071 | Major tail protein | ASCC460_0014    |
| 1072 | Major tail protein | ASCC465_0014    |
| 1073 | Major tail protein | ASCC473_0014    |
| 1074 | Major tail protein | ASCC476_0014    |
| 1075 | Major tail protein | ASCC489_0014    |
| 1076 | Major tail protein | ASCC497_0014    |
| 1077 | Major tail protein | ASCC502_0014    |
| 1078 | Major tail protein | ASCC506_0014    |
| 1079 | Major tail protein | ASCC527_0014    |
| 1080 | Major tail protein | ASCC531_0014    |
| 1081 | Major tail protein | ASCC532_0014    |

|      |                    |              |
|------|--------------------|--------------|
| 1082 | Major tail protein | ASCC544_0014 |
| 1083 | Major tail protein | CB13_0013    |
| 1084 | Major tail protein | CB14_0013    |
| 1085 | Major tail protein | CB19_0013    |
| 1086 | Major tail protein | CB20_0013    |
| 1087 | Major tail protein | LPPV008_gp13 |
| 1088 | Major tail protein | LPV712_gp011 |
| 1089 | Major tail protein | P113G_0011   |
| 1090 | Major tail protein | P272_0011    |
| 1091 | Major tail protein | P475_0012    |
| 1092 | Major tail protein | P680_12      |
| 1093 | Major tail protein | PastusJM3_12 |
| 1094 | Major tail protein | Phi10.5_13   |
| 1095 | Major tail protein | Phi109_14    |
| 1096 | Major tail protein | Phi114_13    |
| 1097 | Major tail protein | Phi129_12    |
| 1098 | Major tail protein | Phi1316_12   |
| 1099 | Major tail protein | Phi145_13    |
| 1100 | Major tail protein | Phi155_14    |
| 1101 | Major tail protein | Phi15_13     |
| 1102 | Major tail protein | Phi16_14     |
| 1103 | Major tail protein | Phi17_13     |
| 1104 | Major tail protein | Phi19.2_12   |
| 1105 | Major tail protein | Phi19.3_12   |
| 1106 | Major tail protein | Phi19_12     |
| 1107 | Major tail protein | Phi4.2_12    |
| 1108 | Major tail protein | Phi40_14     |
| 1109 | Major tail protein | Phi43_12     |
| 1110 | Major tail protein | Phi44_13     |
| 1111 | Major tail protein | Phi4_13      |
| 1112 | Major tail protein | Phi5.12_12   |
| 1113 | Major tail protein | Phi91127_13  |
| 1114 | Major tail protein | Phi93_15     |
| 1115 | Major tail protein | PhiA1127_13  |
| 1116 | Major tail protein | PhiA16_12    |
| 1117 | Major tail protein | PhiB1127_12  |
| 1118 | Major tail protein | PhiC0139_12  |
| 1119 | Major tail protein | PhiD.18_12   |
| 1120 | Major tail protein | PhiE1127_12  |
| 1121 | Major tail protein | PhiF.17_13   |
| 1122 | Major tail protein | PhiF0139_13  |
| 1123 | Major tail protein | PhiG_13      |
| 1124 | Major tail protein | PhiJF1_14    |
| 1125 | Major tail protein | PhiL.18_13   |
| 1126 | Major tail protein | PhiL.6_13    |
| 1127 | Major tail protein | PhiLj_12     |
| 1128 | Major tail protein | PhiM.16_14   |
| 1129 | Major tail protein | PhiM.5_13    |
| 1130 | Major tail protein | PhiM1127_14  |
| 1131 | Major tail protein | PhiS0139_12  |

|      |                    |                 |
|------|--------------------|-----------------|
| 1132 | Major tail protein | SL4_0013        |
| 1133 | Major tail protein | ViridisJM2_gp12 |
| 1134 | Major tail protein | bIBB29_gp11     |
| 1135 | Major tail protein | bIL170p13       |
| 1136 | Major tail protein | fd13_0013       |
| 1137 | Major tail protein | jj50_ORF11      |
| 1138 | Major tail protein | jm1_0012        |
| 1139 | Major tail protein | p2_0011         |
| 1140 | Major tail protein | phi7_12         |
| 1141 | Major tail protein | sk1p11          |
| 1142 | Chaperone Protein  | 340_0014        |
| 1143 | Chaperone Protein  | 645_0013        |
| 1144 | Chaperone Protein  | 936_0012        |
| 1145 | Chaperone Protein  | ASCC191_0015    |
| 1146 | Chaperone Protein  | ASCC273_0015    |
| 1147 | Chaperone Protein  | ASCC281_0015    |
| 1148 | Chaperone Protein  | ASCC284_0015    |
| 1149 | Chaperone Protein  | ASCC287_0015    |
| 1150 | Chaperone Protein  | ASCC310_0015    |
| 1151 | Chaperone Protein  | ASCC324_0015    |
| 1152 | Chaperone Protein  | ASCC337_0015    |
| 1153 | Chaperone Protein  | ASCC356_0015    |
| 1154 | Chaperone Protein  | ASCC358_0015    |
| 1155 | Chaperone Protein  | ASCC365_0015    |
| 1156 | Chaperone Protein  | ASCC368_0015    |
| 1157 | Chaperone Protein  | ASCC395_0015    |
| 1158 | Chaperone Protein  | ASCC397_0015    |
| 1159 | Chaperone Protein  | ASCC406_0015    |
| 1160 | Chaperone Protein  | ASCC454_0015    |
| 1161 | Chaperone Protein  | ASCC460_0015    |
| 1162 | Chaperone Protein  | ASCC465_0015    |
| 1163 | Chaperone Protein  | ASCC473_0015    |
| 1164 | Chaperone Protein  | ASCC476_0015    |
| 1165 | Chaperone Protein  | ASCC489_0015    |
| 1166 | Chaperone Protein  | ASCC497_0015    |
| 1167 | Chaperone Protein  | ASCC502_0015    |
| 1168 | Chaperone Protein  | ASCC506_0015    |
| 1169 | Chaperone Protein  | ASCC527_0015    |
| 1170 | Chaperone Protein  | ASCC531_0015    |
| 1171 | Chaperone Protein  | ASCC532_0015    |
| 1172 | Chaperone Protein  | ASCC544_0015    |
| 1173 | Chaperone Protein  | CB13_0014       |
| 1174 | Chaperone Protein  | CB14_0014       |
| 1175 | Chaperone Protein  | CB19_0014       |
| 1176 | Chaperone Protein  | CB20_0014       |
| 1177 | Chaperone Protein  | LPPV008_gp14    |
| 1178 | Chaperone Protein  | LPV712_gp013    |
| 1179 | Chaperone Protein  | P113G_0013      |
| 1180 | Chaperone Protein  | P272_0013       |
| 1181 | Chaperone Protein  | P475_0014       |

|      |                   |                 |
|------|-------------------|-----------------|
| 1182 | Chaperone Protein | P680_13         |
| 1183 | Chaperone Protein | PastusJM3_13    |
| 1184 | Chaperone Protein | Phi10.5_14      |
| 1185 | Chaperone Protein | Phi109_16       |
| 1186 | Chaperone Protein | Phi114_14       |
| 1187 | Chaperone Protein | Phi129_13       |
| 1188 | Chaperone Protein | Phi1316_13      |
| 1189 | Chaperone Protein | Phi145_15       |
| 1190 | Chaperone Protein | Phi155_15       |
| 1191 | Chaperone Protein | Phi15_14        |
| 1192 | Chaperone Protein | Phi16_16        |
| 1193 | Chaperone Protein | Phi17_15        |
| 1194 | Chaperone Protein | Phi19.2_13      |
| 1195 | Chaperone Protein | Phi19.3_13      |
| 1196 | Chaperone Protein | Phi19_13        |
| 1197 | Chaperone Protein | Phi4.2_14       |
| 1198 | Chaperone Protein | Phi40_16        |
| 1199 | Chaperone Protein | Phi43_13        |
| 1200 | Chaperone Protein | Phi44_14        |
| 1201 | Chaperone Protein | Phi4_14         |
| 1202 | Chaperone Protein | Phi5.12_14      |
| 1203 | Chaperone Protein | Phi91127_15     |
| 1204 | Chaperone Protein | Phi93_17        |
| 1205 | Chaperone Protein | PhiA1127_14     |
| 1206 | Chaperone Protein | PhiA16_13       |
| 1207 | Chaperone Protein | PhiB1127_14     |
| 1208 | Chaperone Protein | PhiC0139_14     |
| 1209 | Chaperone Protein | PhiD.18_13      |
| 1210 | Chaperone Protein | PhiE1127_14     |
| 1211 | Chaperone Protein | PhiF.17_14      |
| 1212 | Chaperone Protein | PhiF0139_14     |
| 1213 | Chaperone Protein | PhiG_14         |
| 1214 | Chaperone Protein | PhiJF1_15       |
| 1215 | Chaperone Protein | PhiL.18_15      |
| 1216 | Chaperone Protein | PhiL.6_15       |
| 1217 | Chaperone Protein | PhiLj_13        |
| 1218 | Chaperone Protein | PhiM.16_15      |
| 1219 | Chaperone Protein | PhiM.5_15       |
| 1220 | Chaperone Protein | PhiM1127_16     |
| 1221 | Chaperone Protein | PhiS0139_13     |
| 1222 | Chaperone Protein | SL4_0014        |
| 1223 | Chaperone Protein | ViridisJM2_gp13 |
| 1224 | Chaperone Protein | bIBB29_gp13     |
| 1225 | Chaperone Protein | bIL170p14       |
| 1226 | Chaperone Protein | fd13_0014       |
| 1227 | Chaperone Protein | jj50_ORF12      |
| 1228 | Chaperone Protein | jm1_0013        |
| 1229 | Chaperone Protein | p2_0012         |
| 1230 | Chaperone Protein | phi7_14         |
| 1231 | Chaperone Protein | sk1p12          |

|      |                   |              |
|------|-------------------|--------------|
| 1232 | Chaperone Protein | 340_0015     |
| 1233 | Chaperone Protein | 645_0014     |
| 1234 | Chaperone Protein | 936_0013     |
| 1235 | Chaperone Protein | ASCC191_0016 |
| 1236 | Chaperone Protein | ASCC273_0016 |
| 1237 | Chaperone Protein | ASCC281_0016 |
| 1238 | Chaperone Protein | ASCC284_0016 |
| 1239 | Chaperone Protein | ASCC287_0016 |
| 1240 | Chaperone Protein | ASCC310_0016 |
| 1241 | Chaperone Protein | ASCC324_0016 |
| 1242 | Chaperone Protein | ASCC337_0016 |
| 1243 | Chaperone Protein | ASCC356_0016 |
| 1244 | Chaperone Protein | ASCC358_0016 |
| 1245 | Chaperone Protein | ASCC365_0016 |
| 1246 | Chaperone Protein | ASCC368_0016 |
| 1247 | Chaperone Protein | ASCC395_0016 |
| 1248 | Chaperone Protein | ASCC397_0016 |
| 1249 | Chaperone Protein | ASCC406_0016 |
| 1250 | Chaperone Protein | ASCC454_0016 |
| 1251 | Chaperone Protein | ASCC460_0016 |
| 1252 | Chaperone Protein | ASCC465_0016 |
| 1253 | Chaperone Protein | ASCC473_0016 |
| 1254 | Chaperone Protein | ASCC476_0016 |
| 1255 | Chaperone Protein | ASCC489_0016 |
| 1256 | Chaperone Protein | ASCC497_0016 |
| 1257 | Chaperone Protein | ASCC502_0016 |
| 1258 | Chaperone Protein | ASCC506_0016 |
| 1259 | Chaperone Protein | ASCC527_0016 |
| 1260 | Chaperone Protein | ASCC531_0016 |
| 1261 | Chaperone Protein | ASCC532_0016 |
| 1262 | Chaperone Protein | ASCC544_0016 |
| 1263 | Chaperone Protein | CB13_0015    |
| 1264 | Chaperone Protein | CB14_0015    |
| 1265 | Chaperone Protein | CB19_0015    |
| 1266 | Chaperone Protein | CB20_0015    |
| 1267 | Chaperone Protein | LPPV008_gp15 |
| 1268 | Chaperone Protein | LPV712_gp014 |
| 1269 | Chaperone Protein | P113G_0014   |
| 1270 | Chaperone Protein | P272_0014    |
| 1271 | Chaperone Protein | P475_0015    |
| 1272 | Chaperone Protein | P680_14      |
| 1273 | Chaperone Protein | PastusJM3_14 |
| 1274 | Chaperone Protein | Phi10.5_15   |
| 1275 | Chaperone Protein | Phi109_17    |
| 1276 | Chaperone Protein | Phi114_15    |
| 1277 | Chaperone Protein | Phi129_14    |
| 1278 | Chaperone Protein | Phi1316_14   |
| 1279 | Chaperone Protein | Phi145_16    |
| 1280 | Chaperone Protein | Phi155_16    |
| 1281 | Chaperone Protein | Phi15_15     |

|      |                      |                 |
|------|----------------------|-----------------|
| 1282 | Chaperone Protein    | Phi16_17        |
| 1283 | Chaperone Protein    | Phi17_16        |
| 1284 | Chaperone Protein    | Phi19.2_14      |
| 1285 | Chaperone Protein    | Phi19.3_14      |
| 1286 | Chaperone Protein    | Phi19_14        |
| 1287 | Chaperone Protein    | Phi4.2_15       |
| 1288 | Chaperone Protein    | Phi40_17        |
| 1289 | Chaperone Protein    | Phi43_14        |
| 1290 | Chaperone Protein    | Phi44_15        |
| 1291 | Chaperone Protein    | Phi4_15         |
| 1292 | Chaperone Protein    | Phi5.12_15      |
| 1293 | Chaperone Protein    | Phi91127_16     |
| 1294 | Chaperone Protein    | Phi93_18        |
| 1295 | Chaperone Protein    | PhiA1127_15     |
| 1296 | Chaperone Protein    | PhiA16_14       |
| 1297 | Chaperone Protein    | PhiB1127_15     |
| 1298 | Chaperone Protein    | PhiC0139_15     |
| 1299 | Chaperone Protein    | PhiD.18_14      |
| 1300 | Chaperone Protein    | PhiE1127_15     |
| 1301 | Chaperone Protein    | PhiF.17_15      |
| 1302 | Chaperone Protein    | PhiF0139_15     |
| 1303 | Chaperone Protein    | PhiG_15         |
| 1304 | Chaperone Protein    | PhiJF1_16       |
| 1305 | Chaperone Protein    | PhiL.18_16      |
| 1306 | Chaperone Protein    | PhiL.6_16       |
| 1307 | Chaperone Protein    | PhiLj_14        |
| 1308 | Chaperone Protein    | PhiM.16_16      |
| 1309 | Chaperone Protein    | PhiM.5_16       |
| 1310 | Chaperone Protein    | PhiM1127_17     |
| 1311 | Chaperone Protein    | PhiS0139_14     |
| 1312 | Chaperone Protein    | SL4_0015        |
| 1313 | Chaperone Protein    | ViridisJM2_gp14 |
| 1314 | Chaperone Protein    | bIBB29_gp14     |
| 1315 | Chaperone Protein    | bIL170p15       |
| 1316 | Chaperone Protein    | fd13_0015       |
| 1317 | Chaperone Protein    | jj50_ORF13      |
| 1318 | Chaperone Protein    | jm1_0014        |
| 1319 | Chaperone Protein    | p2_0013         |
| 1320 | Chaperone Protein    | phi7_15         |
| 1321 | Chaperone Protein    | sk1p13          |
| 1322 | Tape Measure protein | 340_0016        |
| 1323 | Tape Measure protein | 645_0015        |
| 1324 | Tape Measure protein | 936_0014        |
| 1325 | Tape Measure protein | ASCC191_0017    |
| 1326 | Tape Measure protein | ASCC273_0017    |
| 1327 | Tape Measure protein | ASCC281_0017    |
| 1328 | Tape Measure protein | ASCC284_0017    |
| 1329 | Tape Measure protein | ASCC287_0017    |
| 1330 | Tape Measure protein | ASCC310_0017    |
| 1331 | Tape Measure protein | ASCC324_0017    |

1332 Tape Measure protein ASCC337\_0017  
1333 Tape Measure protein ASCC356\_0017  
1334 Tape Measure protein ASCC358\_0017  
1335 Tape Measure protein ASCC365\_0017  
1336 Tape Measure protein ASCC368\_0017  
1337 Tape Measure protein ASCC395\_0017  
1338 Tape Measure protein ASCC397\_0017  
1339 Tape Measure protein ASCC406\_0017  
1340 Tape Measure protein ASCC454\_0017  
1341 Tape Measure protein ASCC460\_0017  
1342 Tape Measure protein ASCC465\_0017  
1343 Tape Measure protein ASCC473\_0017  
1344 Tape Measure protein ASCC476\_0017  
1345 Tape Measure protein ASCC489\_0017  
1346 Tape Measure protein ASCC497\_0017  
1347 Tape Measure protein ASCC502\_0017  
1348 Tape Measure protein ASCC506\_0017  
1349 Tape Measure protein ASCC527\_0017  
1350 Tape Measure protein ASCC531\_0017  
1351 Tape Measure protein ASCC532\_0017  
1352 Tape Measure protein ASCC544\_0017  
1353 Tape Measure protein CB13\_0016  
1354 Tape Measure protein CB14\_0016  
1355 Tape Measure protein CB19\_0016  
1356 Tape Measure protein CB20\_0016  
1357 Tape Measure protein LPPV008\_gp16  
1358 Tape Measure protein LPV712\_gp015  
1359 Tape Measure protein P113G\_0015  
1360 Tape Measure protein P272\_0015  
1361 Tape Measure protein P475\_0016  
1362 Tape Measure protein P680\_15  
1363 Tape Measure protein PastusJM3\_15  
1364 Tape Measure protein Phi10.5\_16  
1365 Tape Measure protein Phi109\_18  
1366 Tape Measure protein Phi114\_16  
1367 Tape Measure protein Phi129\_15  
1368 Tape Measure protein Phi1316\_15  
1369 Tape Measure protein Phi145\_17  
1370 Tape Measure protein Phi155\_17  
1371 Tape Measure protein Phi15\_16  
1372 Tape Measure protein Phi16\_18  
1373 Tape Measure protein Phi17\_17  
1374 Tape Measure protein Phi19.2\_15  
1375 Tape Measure protein Phi19.3\_15  
1376 Tape Measure protein Phi19\_15  
1377 Tape Measure protein Phi4.2\_16  
1378 Tape Measure protein Phi40\_18  
1379 Tape Measure protein Phi43\_15  
1380 Tape Measure protein Phi44\_16  
1381 Tape Measure protein Phi4\_16

1382 Tape Measure protein Phi5.12\_16  
1383 Tape Measure protein Phi91127\_17  
1384 Tape Measure protein Phi93\_19  
1385 Tape Measure protein PhiA1127\_16  
1386 Tape Measure protein PhiA16\_15  
1387 Tape Measure protein PhiB1127\_16  
1388 Tape Measure protein PhiC0139\_16  
1389 Tape Measure protein PhiD.18\_15  
1390 Tape Measure protein PhiE1127\_16  
1391 Tape Measure protein PhiF.17\_16  
1392 Tape Measure protein PhiF0139\_16  
1393 Tape Measure protein PhiG\_16  
1394 Tape Measure protein PhiJF1\_17  
1395 Tape Measure protein PhiL.18\_17  
1396 Tape Measure protein PhiL.6\_17  
1397 Tape Measure protein PhiLj\_15  
1398 Tape Measure protein PhiM.16\_17  
1399 Tape Measure protein PhiM.5\_17  
1400 Tape Measure protein PhiM1127\_18  
1401 Tape Measure protein PhiS0139\_15  
1402 Tape Measure protein SL4\_0016  
1403 Tape Measure protein ViridisJM2\_gp15  
1404 Tape Measure protein bIBB29\_gp15  
1405 Tape Measure protein bIL170p16  
1406 Tape Measure protein fd13\_0016  
1407 Tape Measure protein jj50\_ORF14  
1408 Tape Measure protein jm1\_0015  
1409 Tape Measure protein p2\_0014  
1410 Tape Measure protein phi7\_16  
1411 Tape Measure protein sk1p14  
1412 Distal tail protein 340\_0017  
1413 Distal tail protein 645\_0016  
1414 Distal tail protein 936\_0015  
1415 Distal tail protein ASCC191\_0018  
1416 Distal tail protein ASCC273\_0018  
1417 Distal tail protein ASCC281\_0018  
1418 Distal tail protein ASCC284\_0018  
1419 Distal tail protein ASCC287\_0018  
1420 Distal tail protein ASCC310\_0018  
1421 Distal tail protein ASCC324\_0018  
1422 Distal tail protein ASCC337\_0018  
1423 Distal tail protein ASCC356\_0018  
1424 Distal tail protein ASCC358\_0018  
1425 Distal tail protein ASCC365\_0018  
1426 Distal tail protein ASCC368\_0018  
1427 Distal tail protein ASCC395\_0018  
1428 Distal tail protein ASCC397\_0018  
1429 Distal tail protein ASCC406\_0018  
1430 Distal tail protein ASCC454\_0018  
1431 Distal tail protein ASCC460\_0018



|      |                     |              |
|------|---------------------|--------------|
| 1432 | Distal tail protein | ASCC465_0018 |
| 1433 | Distal tail protein | ASCC473_0018 |
| 1434 | Distal tail protein | ASCC476_0018 |
| 1435 | Distal tail protein | ASCC489_0018 |
| 1436 | Distal tail protein | ASCC497_0018 |
| 1437 | Distal tail protein | ASCC502_0018 |
| 1438 | Distal tail protein | ASCC506_0018 |
| 1439 | Distal tail protein | ASCC527_0018 |
| 1440 | Distal tail protein | ASCC531_0018 |
| 1441 | Distal tail protein | ASCC532_0018 |
| 1442 | Distal tail protein | ASCC544_0018 |
| 1443 | Distal tail protein | CB13_0017    |
| 1444 | Distal tail protein | CB14_0017    |
| 1445 | Distal tail protein | CB19_0017    |
| 1446 | Distal tail protein | CB20_0017    |
| 1447 | Distal tail protein | LPPV008_gp17 |
| 1448 | Distal tail protein | LPV712_gp016 |
| 1449 | Distal tail protein | P113G_0016   |
| 1450 | Distal tail protein | P272_0016    |
| 1451 | Distal tail protein | P475_0017    |
| 1452 | Distal tail protein | P680_16      |
| 1453 | Distal tail protein | PastusJM3_16 |
| 1454 | Distal tail protein | Phi10.5_17   |
| 1455 | Distal tail protein | Phi109_19    |
| 1456 | Distal tail protein | Phi114_17    |
| 1457 | Distal tail protein | Phi129_16    |
| 1458 | Distal tail protein | Phi1316_16   |
| 1459 | Distal tail protein | Phi145_18    |
| 1460 | Distal tail protein | Phi155_18    |
| 1461 | Distal tail protein | Phi15_17     |
| 1462 | Distal tail protein | Phi16_19     |
| 1463 | Distal tail protein | Phi17_18     |
| 1464 | Distal tail protein | Phi19.2_16   |
| 1465 | Distal tail protein | Phi19.3_16   |
| 1466 | Distal tail protein | Phi19_16     |
| 1467 | Distal tail protein | Phi4.2_17    |
| 1468 | Distal tail protein | Phi40_19     |
| 1469 | Distal tail protein | Phi43_16     |
| 1470 | Distal tail protein | Phi44_17     |
| 1471 | Distal tail protein | Phi4_17      |
| 1472 | Distal tail protein | Phi5.12_17   |
| 1473 | Distal tail protein | Phi91127_18  |
| 1474 | Distal tail protein | Phi93_20     |
| 1475 | Distal tail protein | PhiA1127_17  |
| 1476 | Distal tail protein | PhiA16_16    |
| 1477 | Distal tail protein | PhiB1127_17  |
| 1478 | Distal tail protein | PhiC0139_17  |
| 1479 | Distal tail protein | PhiD.18_16   |
| 1480 | Distal tail protein | PhiE1127_17  |
| 1481 | Distal tail protein | PhiF.17_17   |

|      |                       |                 |
|------|-----------------------|-----------------|
| 1482 | Distal tail protein   | PhiF0139_17     |
| 1483 | Distal tail protein   | PhiG_17         |
| 1484 | Distal tail protein   | PhiJF1_18       |
| 1485 | Distal tail protein   | PhiL.18_18      |
| 1486 | Distal tail protein   | PhiL.6_18       |
| 1487 | Distal tail protein   | PhiLj_16        |
| 1488 | Distal tail protein   | PhiM.16_18      |
| 1489 | Distal tail protein   | PhiM.5_18       |
| 1490 | Distal tail protein   | PhiM1127_19     |
| 1491 | Distal tail protein   | PhiS0139_16     |
| 1492 | Distal tail protein   | SL4_0017        |
| 1493 | Distal tail protein   | ViridisJM2_gp16 |
| 1494 | Distal tail protein   | bIBB29_gp16     |
| 1495 | Distal tail protein   | bIL170p17       |
| 1496 | Distal tail protein   | fd13_0017       |
| 1497 | Distal tail protein   | jj50_ORF15      |
| 1498 | Distal tail protein   | jm1_0016        |
| 1499 | Distal tail protein   | p2_0015         |
| 1500 | Distal tail protein   | phi7_17         |
| 1501 | Distal tail protein   | sk1p15          |
| 1502 | Tail associated lysin | 340_0018        |
| 1503 | Tail associated lysin | 645_0017        |
| 1504 | Tail associated lysin | 936_0016        |
| 1505 | Tail associated lysin | ASCC191_0019    |
| 1506 | Tail associated lysin | ASCC273_0019    |
| 1507 | Tail associated lysin | ASCC281_0019    |
| 1508 | Tail associated lysin | ASCC284_0019    |
| 1509 | Tail associated lysin | ASCC287_0019    |
| 1510 | Tail associated lysin | ASCC310_0019    |
| 1511 | Tail associated lysin | ASCC324_0019    |
| 1512 | Tail associated lysin | ASCC337_0019    |
| 1513 | Tail associated lysin | ASCC356_0019    |
| 1514 | Tail associated lysin | ASCC358_0019    |
| 1515 | Tail associated lysin | ASCC365_0019    |
| 1516 | Tail associated lysin | ASCC368_0019    |
| 1517 | Tail associated lysin | ASCC395_0019    |
| 1518 | Tail associated lysin | ASCC397_0019    |
| 1519 | Tail associated lysin | ASCC406_0019    |
| 1520 | Tail associated lysin | ASCC454_0019    |
| 1521 | Tail associated lysin | ASCC460_0019    |
| 1522 | Tail associated lysin | ASCC465_0019    |
| 1523 | Tail associated lysin | ASCC473_0019    |
| 1524 | Tail associated lysin | ASCC476_0019    |
| 1525 | Tail associated lysin | ASCC489_0019    |
| 1526 | Tail associated lysin | ASCC497_0019    |
| 1527 | Tail associated lysin | ASCC502_0019    |
| 1528 | Tail associated lysin | ASCC506_0019    |
| 1529 | Tail associated lysin | ASCC527_0019    |
| 1530 | Tail associated lysin | ASCC531_0019    |
| 1531 | Tail associated lysin | ASCC532_0019    |

|      |                       |              |
|------|-----------------------|--------------|
| 1532 | Tail associated lysin | ASCC544_0019 |
| 1533 | Tail associated lysin | CB13_0018    |
| 1534 | Tail associated lysin | CB14_0018    |
| 1535 | Tail associated lysin | CB19_0018    |
| 1536 | Tail associated lysin | CB20_0018    |
| 1537 | Tail associated lysin | LPPV008_gp18 |
| 1538 | Tail associated lysin | LPV712_gp017 |
| 1539 | Tail associated lysin | P113G_0017   |
| 1540 | Tail associated lysin | P272_0017    |
| 1541 | Tail associated lysin | P475_0018    |
| 1542 | Tail associated lysin | P680_17      |
| 1543 | Tail associated lysin | PastusJM3_17 |
| 1544 | Tail associated lysin | Phi10.5_18   |
| 1545 | Tail associated lysin | Phi109_20    |
| 1546 | Tail associated lysin | Phi114_18    |
| 1547 | Tail associated lysin | Phi129_17    |
| 1548 | Tail associated lysin | Phi1316_17   |
| 1549 | Tail associated lysin | Phi145_19    |
| 1550 | Tail associated lysin | Phi155_19    |
| 1551 | Tail associated lysin | Phi15_18     |
| 1552 | Tail associated lysin | Phi16_20     |
| 1553 | Tail associated lysin | Phi17_19     |
| 1554 | Tail associated lysin | Phi19.2_17   |
| 1555 | Tail associated lysin | Phi19.3_17   |
| 1556 | Tail associated lysin | Phi19_17     |
| 1557 | Tail associated lysin | Phi4.2_18    |
| 1558 | Tail associated lysin | Phi40_20     |
| 1559 | Tail associated lysin | Phi43_17     |
| 1560 | Tail associated lysin | Phi44_18     |
| 1561 | Tail associated lysin | Phi4_18      |
| 1562 | Tail associated lysin | Phi5.12_18   |
| 1563 | Tail associated lysin | Phi91127_19  |
| 1564 | Tail associated lysin | Phi93_21     |
| 1565 | Tail associated lysin | PhiA1127_18  |
| 1566 | Tail associated lysin | PhiA16_17    |
| 1567 | Tail associated lysin | PhiB1127_18  |
| 1568 | Tail associated lysin | PhiC0139_18  |
| 1569 | Tail associated lysin | PhiD.18_17   |
| 1570 | Tail associated lysin | PhiE1127_18  |
| 1571 | Tail associated lysin | PhiF.17_18   |
| 1572 | Tail associated lysin | PhiF0139_18  |
| 1573 | Tail associated lysin | PhiG_18      |
| 1574 | Tail associated lysin | PhiJF1_19    |
| 1575 | Tail associated lysin | PhiL.18_19   |
| 1576 | Tail associated lysin | PhiL.6_19    |
| 1577 | Tail associated lysin | PhiLj_17     |
| 1578 | Tail associated lysin | PhiM.16_19   |
| 1579 | Tail associated lysin | PhiM.5_19    |
| 1580 | Tail associated lysin | PhiM1127_20  |
| 1581 | Tail associated lysin | PhiS0139_17  |

|      |                       |                 |
|------|-----------------------|-----------------|
| 1582 | Tail associated lysin | SL4_0018        |
| 1583 | Tail associated lysin | ViridisJM2_gp17 |
| 1584 | Tail associated lysin | bIBB29_gp17     |
| 1585 | Tail associated lysin | bIL170p18       |
| 1586 | Tail associated lysin | fd13_0018       |
| 1587 | Tail associated lysin | jj50_ORF16      |
| 1588 | Tail associated lysin | jm1_0017        |
| 1589 | Tail associated lysin | p2_0016         |
| 1590 | Tail associated lysin | phi7_18         |
| 1591 | Tail associated lysin | sk1p16          |
| 1592 | Hypothetical protein  | 340_0019        |
| 1593 | Hypothetical protein  | 645_0018        |
| 1594 | Hypothetical protein  | 936_0017        |
| 1595 | Hypothetical protein  | ASCC191_0020    |
| 1596 | Hypothetical protein  | ASCC273_0020    |
| 1597 | Hypothetical protein  | ASCC281_0020    |
| 1598 | Hypothetical protein  | ASCC284_0020    |
| 1599 | Hypothetical protein  | ASCC287_0020    |
| 1600 | Hypothetical protein  | ASCC310_0020    |
| 1601 | Hypothetical protein  | ASCC324_0020    |
| 1602 | Hypothetical protein  | ASCC337_0020    |
| 1603 | Hypothetical protein  | ASCC356_0020    |
| 1604 | Hypothetical protein  | ASCC358_0020    |
| 1605 | Hypothetical protein  | ASCC365_0020    |
| 1606 | Hypothetical protein  | ASCC368_0020    |
| 1607 | Hypothetical protein  | ASCC395_0020    |
| 1608 | Hypothetical protein  | ASCC397_0020    |
| 1609 | Hypothetical protein  | ASCC406_0020    |
| 1610 | Hypothetical protein  | ASCC454_0020    |
| 1611 | Hypothetical protein  | ASCC460_0020    |
| 1612 | Hypothetical protein  | ASCC465_0020    |
| 1613 | Hypothetical protein  | ASCC473_0020    |
| 1614 | Hypothetical protein  | ASCC476_0020    |
| 1615 | Hypothetical protein  | ASCC489_0020    |
| 1616 | Hypothetical protein  | ASCC497_0020    |
| 1617 | Hypothetical protein  | ASCC502_0020    |
| 1618 | Hypothetical protein  | ASCC506_0020    |
| 1619 | Hypothetical protein  | ASCC527_0020    |
| 1620 | Hypothetical protein  | ASCC531_0020    |
| 1621 | Hypothetical protein  | ASCC532_0020    |
| 1622 | Hypothetical protein  | ASCC544_0020    |
| 1623 | Hypothetical protein  | CB13_0019       |
| 1624 | Hypothetical protein  | CB14_0019       |
| 1625 | Hypothetical protein  | CB19_0019       |
| 1626 | Hypothetical protein  | CB20_0019       |
| 1627 | Hypothetical protein  | LPPV008_gp19    |
| 1628 | Hypothetical protein  | LPV712_gp018    |
| 1629 | Hypothetical protein  | P113G_0018      |
| 1630 | Hypothetical protein  | P272_0018       |
| 1631 | Hypothetical protein  | P475_0019       |

|      |                      |                 |
|------|----------------------|-----------------|
| 1632 | Hypothetical protein | P680_18         |
| 1633 | Hypothetical protein | PastusJM3_18    |
| 1634 | Hypothetical protein | Phi10.5_19      |
| 1635 | Hypothetical protein | Phi109_21       |
| 1636 | Hypothetical protein | Phi114_19       |
| 1637 | Hypothetical protein | Phi129_18       |
| 1638 | Hypothetical protein | Phi1316_18      |
| 1639 | Hypothetical protein | Phi145_20       |
| 1640 | Hypothetical protein | Phi155_20       |
| 1641 | Hypothetical protein | Phi15_19        |
| 1642 | Hypothetical protein | Phi16_21        |
| 1643 | Hypothetical protein | Phi17_20        |
| 1644 | Hypothetical protein | Phi19.2_18      |
| 1645 | Hypothetical protein | Phi19.3_18      |
| 1646 | Hypothetical protein | Phi19_18        |
| 1647 | Hypothetical protein | Phi4.2_19       |
| 1648 | Hypothetical protein | Phi40_21        |
| 1649 | Hypothetical protein | Phi43_18        |
| 1650 | Hypothetical protein | Phi44_19        |
| 1651 | Hypothetical protein | Phi4_19         |
| 1652 | Hypothetical protein | Phi5.12_19      |
| 1653 | Hypothetical protein | Phi91127_20     |
| 1654 | Hypothetical protein | Phi93_22        |
| 1655 | Hypothetical protein | PhiA1127_19     |
| 1656 | Hypothetical protein | PhiA16_18       |
| 1657 | Hypothetical protein | PhiB1127_19     |
| 1658 | Hypothetical protein | PhiC0139_19     |
| 1659 | Hypothetical protein | PhiD.18_18      |
| 1660 | Hypothetical protein | PhiE1127_19     |
| 1661 | Hypothetical protein | PhiF.17_19      |
| 1662 | Hypothetical protein | PhiF0139_19     |
| 1663 | Hypothetical protein | PhiG_19         |
| 1664 | Hypothetical protein | PhiJF1_20       |
| 1665 | Hypothetical protein | PhiL.18_20      |
| 1666 | Hypothetical protein | PhiL.6_20       |
| 1667 | Hypothetical protein | PhiLj_18        |
| 1668 | Hypothetical protein | PhiM.16_20      |
| 1669 | Hypothetical protein | PhiM.5_20       |
| 1670 | Hypothetical protein | PhiM1127_21     |
| 1671 | Hypothetical protein | PhiS0139_18     |
| 1672 | Hypothetical protein | SL4_0019        |
| 1673 | Hypothetical protein | ViridisJM2_gp18 |
| 1674 | Hypothetical protein | bIBB29_gp18     |
| 1675 | Hypothetical protein | bIL170p19       |
| 1676 | Hypothetical protein | fd13_0019       |
| 1677 | Hypothetical protein | jj50_ORF17      |
| 1678 | Hypothetical protein | jm1_0018        |
| 1679 | Hypothetical protein | p2_0017         |
| 1680 | Hypothetical protein | phi7_19         |
| 1681 | Hypothetical protein | sk1p17          |

|      |                          |              |
|------|--------------------------|--------------|
| 1682 | Receptor binding protein | 340_0020     |
| 1683 | Receptor binding protein | 645_0019     |
| 1684 | Receptor binding protein | 936_0018     |
| 1685 | Receptor binding protein | ASCC191_0021 |
| 1686 | Receptor binding protein | ASCC273_0021 |
| 1687 | Receptor binding protein | ASCC281_0021 |
| 1688 | Receptor binding protein | ASCC284_0021 |
| 1689 | Receptor binding protein | ASCC287_0021 |
| 1690 | Receptor binding protein | ASCC310_0021 |
| 1691 | Receptor binding protein | ASCC324_0021 |
| 1692 | Receptor binding protein | ASCC337_0021 |
| 1693 | Receptor binding protein | ASCC356_0021 |
| 1694 | Receptor binding protein | ASCC358_0021 |
| 1695 | Receptor binding protein | ASCC365_0021 |
| 1696 | Receptor binding protein | ASCC368_0021 |
| 1697 | Receptor binding protein | ASCC395_0021 |
| 1698 | Receptor binding protein | ASCC397_0021 |
| 1699 | Receptor binding protein | ASCC406_0021 |
| 1700 | Receptor binding protein | ASCC454_0021 |
| 1701 | Receptor binding protein | ASCC460_0021 |
| 1702 | Receptor binding protein | ASCC465_0021 |
| 1703 | Receptor binding protein | ASCC473_0021 |
| 1704 | Receptor binding protein | ASCC476_0021 |
| 1705 | Receptor binding protein | ASCC489_0021 |
| 1706 | Receptor binding protein | ASCC497_0021 |
| 1707 | Receptor binding protein | ASCC502_0021 |
| 1708 | Receptor binding protein | ASCC506_0021 |
| 1709 | Receptor binding protein | ASCC527_0021 |
| 1710 | Receptor binding protein | ASCC531_0021 |
| 1711 | Receptor binding protein | ASCC532_0021 |
| 1712 | Receptor binding protein | ASCC544_0021 |
| 1713 | Receptor binding protein | CB13_0020    |
| 1714 | Receptor binding protein | CB14_0020    |
| 1715 | Receptor binding protein | CB19_0020    |
| 1716 | Receptor binding protein | CB20_0020    |
| 1717 | Receptor binding protein | LPPV008_gp20 |
| 1718 | Receptor binding protein | LPV712_gp019 |
| 1719 | Receptor binding protein | P113G_0019   |
| 1720 | Receptor binding protein | P272_0019    |
| 1721 | Receptor binding protein | P475_0020    |
| 1722 | Receptor binding protein | P680_19      |
| 1723 | Receptor binding protein | PastusJM3_19 |
| 1724 | Receptor binding protein | Phi10.5_20   |
| 1725 | Receptor binding protein | Phi109_22    |
| 1726 | Receptor binding protein | Phi114_20    |
| 1727 | Receptor binding protein | Phi129_19    |
| 1728 | Receptor binding protein | Phi1316_19   |
| 1729 | Receptor binding protein | Phi145_21    |
| 1730 | Receptor binding protein | Phi155_21    |
| 1731 | Receptor binding protein | Phi15_20     |

|      |                          |                 |
|------|--------------------------|-----------------|
| 1732 | Receptor binding protein | Phi16_22        |
| 1733 | Receptor binding protein | Phi17_21        |
| 1734 | Receptor binding protein | Phi19.2_19      |
| 1735 | Receptor binding protein | Phi19.3_19      |
| 1736 | Receptor binding protein | Phi19_19        |
| 1737 | Receptor binding protein | Phi4.2_20       |
| 1738 | Receptor binding protein | Phi4.2_21       |
| 1739 | Receptor binding protein | Phi40_22        |
| 1740 | Receptor binding protein | Phi43_19        |
| 1741 | Receptor binding protein | Phi44_20        |
| 1742 | Receptor binding protein | Phi4_20         |
| 1743 | Receptor binding protein | Phi5.12_20      |
| 1744 | Receptor binding protein | Phi91127_21     |
| 1745 | Receptor binding protein | Phi93_23        |
| 1746 | Receptor binding protein | PhiA1127_20     |
| 1747 | Receptor binding protein | PhiA16_19       |
| 1748 | Receptor binding protein | PhiB1127_20     |
| 1749 | Receptor binding protein | PhiC0139_20     |
| 1750 | Receptor binding protein | PhiD.18_19      |
| 1751 | Receptor binding protein | PhiE1127_20     |
| 1752 | Receptor binding protein | PhiF.17_20      |
| 1753 | Receptor binding protein | PhiF0139_20     |
| 1754 | Receptor binding protein | PhiG_20         |
| 1755 | Receptor binding protein | PhiJF1_21       |
| 1756 | Receptor binding protein | PhiL.18_21      |
| 1757 | Receptor binding protein | PhiL.6_21       |
| 1758 | Receptor binding protein | PhiLj_19        |
| 1759 | Receptor binding protein | PhiM.16_21      |
| 1760 | Receptor binding protein | PhiM.5_21       |
| 1761 | Receptor binding protein | PhiM1127_22     |
| 1762 | Receptor binding protein | PhiS0139_19     |
| 1763 | Receptor binding protein | SL4_0020        |
| 1764 | Receptor binding protein | ViridisJM2_gp19 |
| 1765 | Receptor binding protein | bIBB29_gp19     |
| 1766 | Receptor binding protein | bIL170p20       |
| 1767 | Receptor binding protein | fd13_0020       |
| 1768 | Receptor binding protein | jj50_ORF18      |
| 1769 | Receptor binding protein | jm1_0019        |
| 1770 | Receptor binding protein | p2_0018         |
| 1771 | Receptor binding protein | phi7_20         |
| 1772 | Receptor binding protein | sk1p18          |
| 1773 | Holin 340_0021           |                 |
| 1774 | Holin 645_0020           |                 |
| 1775 | Holin 936_0019           |                 |
| 1776 | Holin ASCC191_0022       |                 |
| 1777 | Holin ASCC273_0022       |                 |
| 1778 | Holin ASCC281_0022       |                 |
| 1779 | Holin ASCC284_0022       |                 |
| 1780 | Holin ASCC287_0022       |                 |
| 1781 | Holin ASCC310_0022       |                 |

|      |       |              |
|------|-------|--------------|
| 1782 | Holin | ASCC324_0022 |
| 1783 | Holin | ASCC337_0022 |
| 1784 | Holin | ASCC356_0022 |
| 1785 | Holin | ASCC358_0022 |
| 1786 | Holin | ASCC365_0022 |
| 1787 | Holin | ASCC368_0022 |
| 1788 | Holin | ASCC395_0022 |
| 1789 | Holin | ASCC397_0022 |
| 1790 | Holin | ASCC406_0022 |
| 1791 | Holin | ASCC454_0022 |
| 1792 | Holin | ASCC460_0022 |
| 1793 | Holin | ASCC465_0022 |
| 1794 | Holin | ASCC473_0022 |
| 1795 | Holin | ASCC476_0022 |
| 1796 | Holin | ASCC489_0022 |
| 1797 | Holin | ASCC497_0022 |
| 1798 | Holin | ASCC502_0022 |
| 1799 | Holin | ASCC506_0022 |
| 1800 | Holin | ASCC527_0022 |
| 1801 | Holin | ASCC531_0022 |
| 1802 | Holin | ASCC532_0022 |
| 1803 | Holin | ASCC544_0022 |
| 1804 | Holin | CB13_0021    |
| 1805 | Holin | CB14_0021    |
| 1806 | Holin | CB19_0021    |
| 1807 | Holin | CB20_0021    |
| 1808 | Holin | LPPV008_gp21 |
| 1809 | Holin | LPV712_gp020 |
| 1810 | Holin | P113G_0020   |
| 1811 | Holin | P272_0020    |
| 1812 | Holin | P475_0021    |
| 1813 | Holin | P680_20      |
| 1814 | Holin | PastusJM3_20 |
| 1815 | Holin | Phi10.5_21   |
| 1816 | Holin | Phi109_23    |
| 1817 | Holin | Phi114_21    |
| 1818 | Holin | Phi129_20    |
| 1819 | Holin | Phi1316_20   |
| 1820 | Holin | Phi145_22    |
| 1821 | Holin | Phi155_22    |
| 1822 | Holin | Phi15_21     |
| 1823 | Holin | Phi16_23     |
| 1824 | Holin | Phi17_22     |
| 1825 | Holin | Phi19.2_20   |
| 1826 | Holin | Phi19.3_20   |
| 1827 | Holin | Phi19_20     |
| 1828 | Holin | Phi4.2_22    |
| 1829 | Holin | Phi40_23     |
| 1830 | Holin | Phi43_20     |
| 1831 | Holin | Phi44_21     |



|      |       |                 |
|------|-------|-----------------|
| 1832 | Holin | Phi4_21         |
| 1833 | Holin | Phi5.12_21      |
| 1834 | Holin | Phi91127_22     |
| 1835 | Holin | Phi93_24        |
| 1836 | Holin | PhiA1127_21     |
| 1837 | Holin | PhiA16_20       |
| 1838 | Holin | PhiB1127_21     |
| 1839 | Holin | PhiC0139_21     |
| 1840 | Holin | PhiD.18_20      |
| 1841 | Holin | PhiE1127_21     |
| 1842 | Holin | PhiF.17_21      |
| 1843 | Holin | PhiF0139_21     |
| 1844 | Holin | PhiG_21         |
| 1845 | Holin | PhiJF1_22       |
| 1846 | Holin | PhiL.18_22      |
| 1847 | Holin | PhiL.6_22       |
| 1848 | Holin | PhiLj_20        |
| 1849 | Holin | PhiM.16_22      |
| 1850 | Holin | PhiM.5_22       |
| 1851 | Holin | PhiM1127_23     |
| 1852 | Holin | PhiS0139_20     |
| 1853 | Holin | SL4_0021        |
| 1854 | Holin | ViridisJM2_gp20 |
| 1855 | Holin | bIBB29_gp20     |
| 1856 | Holin | bIL170p21       |
| 1857 | Holin | fd13_0021       |
| 1858 | Holin | jj50_ORF19      |
| 1859 | Holin | jm1_0020        |
| 1860 | Holin | p2_0019         |
| 1861 | Holin | phi7_21         |
| 1862 | Holin | sk1p19          |
| 1863 | Lysin | 340_0022        |
| 1864 | Lysin | 645_0021        |
| 1865 | Lysin | 936_0020        |
| 1866 | Lysin | ASCC191_0023    |
| 1867 | Lysin | ASCC273_0023    |
| 1868 | Lysin | ASCC281_0023    |
| 1869 | Lysin | ASCC284_0023    |
| 1870 | Lysin | ASCC287_0023    |
| 1871 | Lysin | ASCC310_0023    |
| 1872 | Lysin | ASCC324_0023    |
| 1873 | Lysin | ASCC337_0023    |
| 1874 | Lysin | ASCC356_0023    |
| 1875 | Lysin | ASCC358_0023    |
| 1876 | Lysin | ASCC365_0023    |
| 1877 | Lysin | ASCC368_0023    |
| 1878 | Lysin | ASCC395_0023    |
| 1879 | Lysin | ASCC397_0023    |
| 1880 | Lysin | ASCC406_0023    |
| 1881 | Lysin | ASCC454_0023    |

|      |       |              |
|------|-------|--------------|
| 1882 | Lysin | ASCC460_0023 |
| 1883 | Lysin | ASCC465_0023 |
| 1884 | Lysin | ASCC473_0023 |
| 1885 | Lysin | ASCC476_0023 |
| 1886 | Lysin | ASCC489_0023 |
| 1887 | Lysin | ASCC497_0023 |
| 1888 | Lysin | ASCC502_0023 |
| 1889 | Lysin | ASCC506_0023 |
| 1890 | Lysin | ASCC527_0023 |
| 1891 | Lysin | ASCC531_0023 |
| 1892 | Lysin | ASCC532_0023 |
| 1893 | Lysin | ASCC544_0023 |
| 1894 | Lysin | CB13_0022    |
| 1895 | Lysin | CB14_0022    |
| 1896 | Lysin | CB19_0022    |
| 1897 | Lysin | CB20_0022    |
| 1898 | Lysin | LPPV008_gp22 |
| 1899 | Lysin | LPV712_gp021 |
| 1900 | Lysin | P113G_0021   |
| 1901 | Lysin | P272_0021    |
| 1902 | Lysin | P475_0022    |
| 1903 | Lysin | P680_21      |
| 1904 | Lysin | PastusJM3_21 |
| 1905 | Lysin | Phi10.5_22   |
| 1906 | Lysin | Phi109_24    |
| 1907 | Lysin | Phi114_22    |
| 1908 | Lysin | Phi129_21    |
| 1909 | Lysin | Phi1316_21   |
| 1910 | Lysin | Phi145_23    |
| 1911 | Lysin | Phi155_23    |
| 1912 | Lysin | Phi15_22     |
| 1913 | Lysin | Phi16_24     |
| 1914 | Lysin | Phi17_23     |
| 1915 | Lysin | Phi19.2_21   |
| 1916 | Lysin | Phi19.3_21   |
| 1917 | Lysin | Phi19_21     |
| 1918 | Lysin | Phi4.2_23    |
| 1919 | Lysin | Phi40_24     |
| 1920 | Lysin | Phi43_21     |
| 1921 | Lysin | Phi44_22     |
| 1922 | Lysin | Phi4_22      |
| 1923 | Lysin | Phi5.12_22   |
| 1924 | Lysin | Phi91127_23  |
| 1925 | Lysin | Phi93_25     |
| 1926 | Lysin | PhiA1127_22  |
| 1927 | Lysin | PhiA16_21    |
| 1928 | Lysin | PhiB1127_22  |
| 1929 | Lysin | PhiC0139_22  |
| 1930 | Lysin | PhiD.18_21   |
| 1931 | Lysin | PhiE1127_22  |

1932 Lysin PhiF.17\_22  
1933 Lysin PhiF0139\_22  
1934 Lysin PhiG\_22  
1935 Lysin PhiJF1\_23  
1936 Lysin PhiL.18\_23  
1937 Lysin PhiL.6\_23  
1938 Lysin PhiLj\_21  
1939 Lysin PhiM.16\_23  
1940 Lysin PhiM.5\_23  
1941 Lysin PhiM1127\_24  
1942 Lysin PhiS0139\_21  
1943 Lysin SL4\_0022  
1944 Lysin ViridisJM2\_gp21  
1945 Lysin bIBB29\_gp21  
1946 Lysin bIL170p22  
1947 Lysin fd13\_0022  
1948 Lysin jj50\_ORF20  
1949 Lysin jm1\_0021  
1950 Lysin p2\_0020  
1951 Lysin phi7\_22  
1952 Lysin sk1p20  
1953 Hypothetical protein 340\_0026  
1954 Hypothetical protein 645\_0025  
1955 Hypothetical protein 936\_0022  
1956 Hypothetical protein ASCC191\_0025  
1957 Hypothetical protein ASCC273\_0025  
1958 Hypothetical protein ASCC281\_0026  
1959 Hypothetical protein ASCC284\_0025  
1960 Hypothetical protein ASCC287\_0025  
1961 Hypothetical protein ASCC310\_0025  
1962 Hypothetical protein ASCC324\_0025  
1963 Hypothetical protein ASCC337\_0025  
1964 Hypothetical protein ASCC356\_0025  
1965 Hypothetical protein ASCC358\_0026  
1966 Hypothetical protein ASCC365\_0026  
1967 Hypothetical protein ASCC368\_0025  
1968 Hypothetical protein ASCC395\_0025  
1969 Hypothetical protein ASCC397\_0025  
1970 Hypothetical protein ASCC406\_0025  
1971 Hypothetical protein ASCC454\_0025  
1972 Hypothetical protein ASCC460\_0025  
1973 Hypothetical protein ASCC465\_0026  
1974 Hypothetical protein ASCC473\_0026  
1975 Hypothetical protein ASCC476\_0025  
1976 Hypothetical protein ASCC489\_0026  
1977 Hypothetical protein ASCC497\_0026  
1978 Hypothetical protein ASCC502\_0025  
1979 Hypothetical protein ASCC506\_0025  
1980 Hypothetical protein ASCC527\_0025  
1981 Hypothetical protein ASCC531\_0026

|      |                      |              |
|------|----------------------|--------------|
| 1982 | Hypothetical protein | ASCC532_0025 |
| 1983 | Hypothetical protein | ASCC544_0025 |
| 1984 | Hypothetical protein | CB13_0024    |
| 1985 | Hypothetical protein | CB14_0024    |
| 1986 | Hypothetical protein | CB19_0024    |
| 1987 | Hypothetical protein | CB20_0024    |
| 1988 | Hypothetical protein | LPPV008_gp25 |
| 1989 | Hypothetical protein | LPV712_gp024 |
| 1990 | Hypothetical protein | P113G_0026   |
| 1991 | Hypothetical protein | P272_0026    |
| 1992 | Hypothetical protein | P475_0026    |
| 1993 | Hypothetical protein | P680_25      |
| 1994 | Hypothetical protein | PastusJM3_24 |
| 1995 | Hypothetical protein | Phi10.5_26   |
| 1996 | Hypothetical protein | Phi109_28    |
| 1997 | Hypothetical protein | Phi114_24    |
| 1998 | Hypothetical protein | Phi129_23    |
| 1999 | Hypothetical protein | Phi1316_22   |
| 2000 | Hypothetical protein | Phi145_27    |
| 2001 | Hypothetical protein | Phi155_27    |
| 2002 | Hypothetical protein | Phi15_25     |
| 2003 | Hypothetical protein | Phi16_28     |
| 2004 | Hypothetical protein | Phi17_27     |
| 2005 | Hypothetical protein | Phi19.2_22   |
| 2006 | Hypothetical protein | Phi19.3_22   |
| 2007 | Hypothetical protein | Phi19_22     |
| 2008 | Hypothetical protein | Phi4.2_27    |
| 2009 | Hypothetical protein | Phi40_28     |
| 2010 | Hypothetical protein | Phi43_23     |
| 2011 | Hypothetical protein | Phi44_25     |
| 2012 | Hypothetical protein | Phi4_23      |
| 2013 | Hypothetical protein | Phi5.12_24   |
| 2014 | Hypothetical protein | Phi91127_27  |
| 2015 | Hypothetical protein | Phi93_29     |
| 2016 | Hypothetical protein | PhiA1127_23  |
| 2017 | Hypothetical protein | PhiA16_22    |
| 2018 | Hypothetical protein | PhiB1127_23  |
| 2019 | Hypothetical protein | PhiC0139_23  |
| 2020 | Hypothetical protein | PhiD.18_23   |
| 2021 | Hypothetical protein | PhiE1127_25  |
| 2022 | Hypothetical protein | PhiF.17_24   |
| 2023 | Hypothetical protein | PhiF0139_24  |
| 2024 | Hypothetical protein | PhiG_24      |
| 2025 | Hypothetical protein | PhiJF1_25    |
| 2026 | Hypothetical protein | PhiL.18_27   |
| 2027 | Hypothetical protein | PhiL.6_27    |
| 2028 | Hypothetical protein | PhiLj_22     |
| 2029 | Hypothetical protein | PhiM.16_26   |
| 2030 | Hypothetical protein | PhiM.5_27    |
| 2031 | Hypothetical protein | PhiM1127_28  |

|      |                      |                 |
|------|----------------------|-----------------|
| 2032 | Hypothetical protein | PhiS0139_22     |
| 2033 | Hypothetical protein | SL4_0025        |
| 2034 | Hypothetical protein | ViridisJM2_gp23 |
| 2035 | Hypothetical protein | bIBB29_gp25     |
| 2036 | Hypothetical protein | bIL170p27       |
| 2037 | Hypothetical protein | fd13_0024       |
| 2038 | Hypothetical protein | jj50_ORF21      |
| 2039 | Hypothetical protein | jm1_0023        |
| 2040 | Hypothetical protein | p2_0022         |
| 2041 | Hypothetical protein | phi7_25         |
| 2042 | Hypothetical protein | sk1p22          |
| 2043 | Hypothetical protein | 340_0027        |
| 2044 | Hypothetical protein | 645_0026        |
| 2045 | Hypothetical protein | 936_0024        |
| 2046 | Hypothetical protein | ASCC191_0026    |
| 2047 | Hypothetical protein | ASCC273_0026    |
| 2048 | Hypothetical protein | ASCC281_0028    |
| 2049 | Hypothetical protein | ASCC284_0027    |
| 2050 | Hypothetical protein | ASCC287_0026    |
| 2051 | Hypothetical protein | ASCC310_0027    |
| 2052 | Hypothetical protein | ASCC324_0026    |
| 2053 | Hypothetical protein | ASCC337_0026    |
| 2054 | Hypothetical protein | ASCC356_0027    |
| 2055 | Hypothetical protein | ASCC358_0028    |
| 2056 | Hypothetical protein | ASCC365_0028    |
| 2057 | Hypothetical protein | ASCC368_0026    |
| 2058 | Hypothetical protein | ASCC395_0026    |
| 2059 | Hypothetical protein | ASCC397_0026    |
| 2060 | Hypothetical protein | ASCC406_0026    |
| 2061 | Hypothetical protein | ASCC454_0026    |
| 2062 | Hypothetical protein | ASCC460_0026    |
| 2063 | Hypothetical protein | ASCC465_0028    |
| 2064 | Hypothetical protein | ASCC473_0028    |
| 2065 | Hypothetical protein | ASCC476_0026    |
| 2066 | Hypothetical protein | ASCC489_0027    |
| 2067 | Hypothetical protein | ASCC497_0028    |
| 2068 | Hypothetical protein | ASCC502_0026    |
| 2069 | Hypothetical protein | ASCC506_0026    |
| 2070 | Hypothetical protein | ASCC527_0026    |
| 2071 | Hypothetical protein | ASCC531_0028    |
| 2072 | Hypothetical protein | ASCC532_0027    |
| 2073 | Hypothetical protein | ASCC544_0026    |
| 2074 | Hypothetical protein | CB13_0025       |
| 2075 | Hypothetical protein | CB14_0025       |
| 2076 | Hypothetical protein | CB19_0025       |
| 2077 | Hypothetical protein | CB20_0025       |
| 2078 | Hypothetical protein | LPPV008_gp26    |
| 2079 | Hypothetical protein | LPV712_gp026    |
| 2080 | Hypothetical protein | P113G_0027      |
| 2081 | Hypothetical protein | P272_0027       |

|      |                      |                 |
|------|----------------------|-----------------|
| 2082 | Hypothetical protein | P475_0027       |
| 2083 | Hypothetical protein | P680_26         |
| 2084 | Hypothetical protein | PastusJM3_25    |
| 2085 | Hypothetical protein | Phi10.5_28      |
| 2086 | Hypothetical protein | Phi109_31       |
| 2087 | Hypothetical protein | Phi114_26       |
| 2088 | Hypothetical protein | Phi129_25       |
| 2089 | Hypothetical protein | Phi1316_24      |
| 2090 | Hypothetical protein | Phi145_30       |
| 2091 | Hypothetical protein | Phi155_29       |
| 2092 | Hypothetical protein | Phi15_27        |
| 2093 | Hypothetical protein | Phi16_30        |
| 2094 | Hypothetical protein | Phi17_29        |
| 2095 | Hypothetical protein | Phi19.2_24      |
| 2096 | Hypothetical protein | Phi19.3_24      |
| 2097 | Hypothetical protein | Phi19_24        |
| 2098 | Hypothetical protein | Phi4.2_29       |
| 2099 | Hypothetical protein | Phi40_30        |
| 2100 | Hypothetical protein | Phi43_25        |
| 2101 | Hypothetical protein | Phi44_26        |
| 2102 | Hypothetical protein | Phi4_25         |
| 2103 | Hypothetical protein | Phi5.12_25      |
| 2104 | Hypothetical protein | Phi91127_29     |
| 2105 | Hypothetical protein | Phi93_32        |
| 2106 | Hypothetical protein | PhiA1127_25     |
| 2107 | Hypothetical protein | PhiA16_24       |
| 2108 | Hypothetical protein | PhiB1127_25     |
| 2109 | Hypothetical protein | PhiC0139_25     |
| 2110 | Hypothetical protein | PhiD.18_25      |
| 2111 | Hypothetical protein | PhiE1127_27     |
| 2112 | Hypothetical protein | PhiF.17_26      |
| 2113 | Hypothetical protein | PhiF0139_26     |
| 2114 | Hypothetical protein | PhiG_26         |
| 2115 | Hypothetical protein | PhiJF1_27       |
| 2116 | Hypothetical protein | PhiL.18_29      |
| 2117 | Hypothetical protein | PhiL.6_29       |
| 2118 | Hypothetical protein | PhiLj_24        |
| 2119 | Hypothetical protein | PhiM.16_29      |
| 2120 | Hypothetical protein | PhiM.5_29       |
| 2121 | Hypothetical protein | PhiM1127_30     |
| 2122 | Hypothetical protein | PhiS0139_24     |
| 2123 | Hypothetical protein | SL4_0026        |
| 2124 | Hypothetical protein | ViridisJM2_gp24 |
| 2125 | Hypothetical protein | bIBB29_gp26b    |
| 2126 | Hypothetical protein | bIBB29_gp27     |
| 2127 | Hypothetical protein | bIL170p29       |
| 2128 | Hypothetical protein | fd13_0026       |
| 2129 | Hypothetical protein | jj50_ORF22      |
| 2130 | Hypothetical protein | jm1_0025        |
| 2131 | Hypothetical protein | p2_0023         |

|      |                      |               |
|------|----------------------|---------------|
| 2132 | Hypothetical protein | phi7_26       |
| 2133 | Hypothetical protein | sk1p24        |
| 2134 | Hypothetical protein | 340_0040      |
| 2135 | Hypothetical protein | 645_0036      |
| 2136 | Hypothetical protein | 936_0035      |
| 2137 | Hypothetical protein | ASCC191_0041  |
| 2138 | Hypothetical protein | ASCC273_0040  |
| 2139 | Hypothetical protein | ASCC281_0040  |
| 2140 | Hypothetical protein | ASCC284_0040  |
| 2141 | Hypothetical protein | ASCC287_0040  |
| 2142 | Hypothetical protein | ASCC310_0040  |
| 2143 | Hypothetical protein | ASCC324_0040  |
| 2144 | Hypothetical protein | ASCC337_0040  |
| 2145 | Hypothetical protein | ASCC356_0040  |
| 2146 | Hypothetical protein | ASCC358_0040  |
| 2147 | Hypothetical protein | ASCC365_0040  |
| 2148 | Hypothetical protein | ASCC368_0040  |
| 2149 | Hypothetical protein | ASCC395_0040  |
| 2150 | Hypothetical protein | ASCC397_0040  |
| 2151 | Hypothetical protein | ASCC406_0040  |
| 2152 | Hypothetical protein | ASCC454_0040  |
| 2153 | Hypothetical protein | ASCC460_0040  |
| 2154 | Hypothetical protein | ASCC465_0041  |
| 2155 | Hypothetical protein | ASCC473_0041  |
| 2156 | Hypothetical protein | ASCC476_0040  |
| 2157 | Hypothetical protein | ASCC489_0040  |
| 2158 | Hypothetical protein | ASCC497_0041  |
| 2159 | Hypothetical protein | ASCC502_0040  |
| 2160 | Hypothetical protein | ASCC506_0040  |
| 2161 | Hypothetical protein | ASCC527_0040  |
| 2162 | Hypothetical protein | ASCC531_0041  |
| 2163 | Hypothetical protein | ASCC532_0040a |
| 2164 | Hypothetical protein | ASCC544_0040  |
| 2165 | Hypothetical protein | CB13_0039     |
| 2166 | Hypothetical protein | CB14_0036     |
| 2167 | Hypothetical protein | CB19_0036     |
| 2168 | Hypothetical protein | CB20_0036     |
| 2169 | Hypothetical protein | LPPV008_gp37  |
| 2170 | Hypothetical protein | LPV712_gp032  |
| 2171 | Hypothetical protein | P113G_0038    |
| 2172 | Hypothetical protein | P272_0040     |
| 2173 | Hypothetical protein | P475_0039     |
| 2174 | Hypothetical protein | P680_36       |
| 2175 | Hypothetical protein | PastusJM3_34  |
| 2176 | Hypothetical protein | Phi10.5_45    |
| 2177 | Hypothetical protein | Phi109_40     |
| 2178 | Hypothetical protein | Phi114_39     |
| 2179 | Hypothetical protein | Phi129_36     |
| 2180 | Hypothetical protein | Phi1316_38    |
| 2181 | Hypothetical protein | Phi145_39     |

|      |                      |                 |
|------|----------------------|-----------------|
| 2182 | Hypothetical protein | Phi155_38       |
| 2183 | Hypothetical protein | Phi15_40        |
| 2184 | Hypothetical protein | Phi16_40        |
| 2185 | Hypothetical protein | Phi17_39        |
| 2186 | Hypothetical protein | Phi19.2_39      |
| 2187 | Hypothetical protein | Phi19.3_37      |
| 2188 | Hypothetical protein | Phi19_33        |
| 2189 | Hypothetical protein | Phi4.2_41       |
| 2190 | Hypothetical protein | Phi40_40        |
| 2191 | Hypothetical protein | Phi43_36        |
| 2192 | Hypothetical protein | Phi44_39        |
| 2193 | Hypothetical protein | Phi4_35         |
| 2194 | Hypothetical protein | Phi5.12_37      |
| 2195 | Hypothetical protein | Phi91127_40     |
| 2196 | Hypothetical protein | Phi93_41        |
| 2197 | Hypothetical protein | PhiA1127_36     |
| 2198 | Hypothetical protein | PhiA16_35       |
| 2199 | Hypothetical protein | PhiB1127_38     |
| 2200 | Hypothetical protein | PhiC0139_38     |
| 2201 | Hypothetical protein | PhiD.18_36      |
| 2202 | Hypothetical protein | PhiE1127_40     |
| 2203 | Hypothetical protein | PhiF.17_40      |
| 2204 | Hypothetical protein | PhiF0139_40     |
| 2205 | Hypothetical protein | PhiG_39         |
| 2206 | Hypothetical protein | PhiG_40         |
| 2207 | Hypothetical protein | PhiJF1_40       |
| 2208 | Hypothetical protein | PhiL.18_39      |
| 2209 | Hypothetical protein | PhiL.6_42       |
| 2210 | Hypothetical protein | PhiLj_34        |
| 2211 | Hypothetical protein | PhiM.16_39      |
| 2212 | Hypothetical protein | PhiM.5_41       |
| 2213 | Hypothetical protein | PhiM1127_43     |
| 2214 | Hypothetical protein | PhiS0139_36     |
| 2215 | Hypothetical protein | SL4_0036        |
| 2216 | Hypothetical protein | ViridisJM2_gp39 |
| 2217 | Hypothetical protein | bIBB29_gp39     |
| 2218 | Hypothetical protein | bIL170p45       |
| 2219 | Hypothetical protein | fd13_0036       |
| 2220 | Hypothetical protein | jj50_ORF31      |
| 2221 | Hypothetical protein | jm1_0036        |
| 2222 | Hypothetical protein | p2_0032         |
| 2223 | Hypothetical protein | phi7_38         |
| 2224 | Hypothetical protein | sk1p34          |
| 2225 | Hypothetical protein | 340_0041        |
| 2226 | Hypothetical protein | 645_0037        |
| 2227 | Hypothetical protein | 936_0036        |
| 2228 | Hypothetical protein | ASCC191_0043    |
| 2229 | Hypothetical protein | ASCC273_0042    |
| 2230 | Hypothetical protein | ASCC281_0041    |
| 2231 | Hypothetical protein | ASCC284_0041    |



|      |                      |              |
|------|----------------------|--------------|
| 2232 | Hypothetical protein | ASCC287_0042 |
| 2233 | Hypothetical protein | ASCC310_0041 |
| 2234 | Hypothetical protein | ASCC324_0042 |
| 2235 | Hypothetical protein | ASCC337_0042 |
| 2236 | Hypothetical protein | ASCC356_0041 |
| 2237 | Hypothetical protein | ASCC358_0041 |
| 2238 | Hypothetical protein | ASCC365_0041 |
| 2239 | Hypothetical protein | ASCC368_0042 |
| 2240 | Hypothetical protein | ASCC395_0042 |
| 2241 | Hypothetical protein | ASCC397_0042 |
| 2242 | Hypothetical protein | ASCC406_0042 |
| 2243 | Hypothetical protein | ASCC454_0042 |
| 2244 | Hypothetical protein | ASCC460_0042 |
| 2245 | Hypothetical protein | ASCC465_0042 |
| 2246 | Hypothetical protein | ASCC473_0042 |
| 2247 | Hypothetical protein | ASCC476_0042 |
| 2248 | Hypothetical protein | ASCC489_0041 |
| 2249 | Hypothetical protein | ASCC497_0042 |
| 2250 | Hypothetical protein | ASCC502_0042 |
| 2251 | Hypothetical protein | ASCC506_0042 |
| 2252 | Hypothetical protein | ASCC527_0042 |
| 2253 | Hypothetical protein | ASCC531_0042 |
| 2254 | Hypothetical protein | ASCC532_0043 |
| 2255 | Hypothetical protein | ASCC544_0042 |
| 2256 | Hypothetical protein | CB13_0040    |
| 2257 | Hypothetical protein | CB14_0037    |
| 2258 | Hypothetical protein | CB19_0037    |
| 2259 | Hypothetical protein | CB20_0037    |
| 2260 | Hypothetical protein | LPPV008_gp38 |
| 2261 | Hypothetical protein | LPV712_gp033 |
| 2262 | Hypothetical protein | P113G_0039   |
| 2263 | Hypothetical protein | P272_0041    |
| 2264 | Hypothetical protein | P475_0040    |
| 2265 | Hypothetical protein | P680_37      |
| 2266 | Hypothetical protein | PastusJM3_35 |
| 2267 | Hypothetical protein | Phi10.5_46   |
| 2268 | Hypothetical protein | Phi109_41    |
| 2269 | Hypothetical protein | Phi114_40    |
| 2270 | Hypothetical protein | Phi129_37    |
| 2271 | Hypothetical protein | Phi1316_39   |
| 2272 | Hypothetical protein | Phi145_40    |
| 2273 | Hypothetical protein | Phi155_39    |
| 2274 | Hypothetical protein | Phi15_41     |
| 2275 | Hypothetical protein | Phi16_41     |
| 2276 | Hypothetical protein | Phi17_40     |
| 2277 | Hypothetical protein | Phi19.2_40   |
| 2278 | Hypothetical protein | Phi19.3_38   |
| 2279 | Hypothetical protein | Phi19_34     |
| 2280 | Hypothetical protein | Phi4.2_42    |
| 2281 | Hypothetical protein | Phi40_41     |

2282 Hypothetical protein Phi43\_37  
2283 Hypothetical protein Phi44\_40  
2284 Hypothetical protein Phi4\_36  
2285 Hypothetical protein Phi5.12\_38  
2286 Hypothetical protein Phi91127\_41  
2287 Hypothetical protein Phi93\_42  
2288 Hypothetical protein PhiA1127\_37  
2289 Hypothetical protein PhiA16\_36  
2290 Hypothetical protein PhiB1127\_39  
2291 Hypothetical protein PhiC0139\_39  
2292 Hypothetical protein PhiD.18\_37  
2293 Hypothetical protein PhiE1127\_41  
2294 Hypothetical protein PhiF.17\_41  
2295 Hypothetical protein PhiF0139\_41  
2296 Hypothetical protein PhiG\_41  
2297 Hypothetical protein PhiJF1\_41  
2298 Hypothetical protein PhiL.18\_40  
2299 Hypothetical protein PhiL.6\_43  
2300 Hypothetical protein PhiLj\_35  
2301 Hypothetical protein PhiM.16\_40  
2302 Hypothetical protein PhiM.5\_42  
2303 Hypothetical protein PhiM1127\_44  
2304 Hypothetical protein PhiS0139\_37  
2305 Hypothetical protein SL4\_0037  
2306 Hypothetical protein ViridisJM2\_gp40  
2307 Hypothetical protein bIBB29\_gp40  
2308 Hypothetical protein bIL170p46  
2309 Hypothetical protein fd13\_0037  
2310 Hypothetical protein jj50\_ORF32  
2311 Hypothetical protein jm1\_0037  
2312 Hypothetical protein p2\_0033  
2313 Hypothetical protein phi7\_39  
2314 Hypothetical protein sk1p35  
2315 Single stranded DNA binding protein340\_0042  
2316 Single stranded DNA binding protein645\_0038  
2317 Single stranded DNA binding protein936\_0037  
2318 Single stranded DNA binding proteinASCC191\_0044  
2319 Single stranded DNA binding proteinASCC273\_0043  
2320 Single stranded DNA binding proteinASCC281\_0042  
2321 Single stranded DNA binding proteinASCC284\_0042  
2322 Single stranded DNA binding proteinASCC287\_0043  
2323 Single stranded DNA binding proteinASCC310\_0042  
2324 Single stranded DNA binding proteinASCC324\_0043  
2325 Single stranded DNA binding proteinASCC337\_0043  
2326 Single stranded DNA binding proteinASCC356\_0042  
2327 Single stranded DNA binding proteinASCC358\_0042  
2328 Single stranded DNA binding proteinASCC365\_0042  
2329 Single stranded DNA binding proteinASCC368\_0043  
2330 Single stranded DNA binding proteinASCC395\_0043  
2331 Single stranded DNA binding proteinASCC397\_0043

2332 Single stranded DNA binding proteinASCC406\_0043  
2333 Single stranded DNA binding proteinASCC454\_0043  
2334 Single stranded DNA binding proteinASCC460\_0043  
2335 Single stranded DNA binding proteinASCC465\_0043  
2336 Single stranded DNA binding proteinASCC473\_0043  
2337 Single stranded DNA binding proteinASCC476\_0043  
2338 Single stranded DNA binding proteinASCC489\_0042  
2339 Single stranded DNA binding proteinASCC497\_0043  
2340 Single stranded DNA binding proteinASCC502\_0043  
2341 Single stranded DNA binding proteinASCC506\_0043  
2342 Single stranded DNA binding proteinASCC527\_0043  
2343 Single stranded DNA binding proteinASCC531\_0043  
2344 Single stranded DNA binding proteinASCC532\_0044  
2345 Single stranded DNA binding proteinASCC544\_0043  
2346 Single stranded DNA binding proteinCB13\_0041  
2347 Single stranded DNA binding proteinCB14\_0038  
2348 Single stranded DNA binding proteinCB19\_0038  
2349 Single stranded DNA binding proteinCB20\_0038  
2350 Single stranded DNA binding proteinLPPV008\_gp39  
2351 Single stranded DNA binding proteinLPV712\_gp034  
2352 Single stranded DNA binding proteinP113G\_0040  
2353 Single stranded DNA binding proteinP272\_0042  
2354 Single stranded DNA binding proteinP475\_0041  
2355 Single stranded DNA binding proteinP680\_38  
2356 Single stranded DNA binding proteinPastusJM3\_36  
2357 Single stranded DNA binding proteinPhi10.5\_47  
2358 Single stranded DNA binding proteinPhi109\_42  
2359 Single stranded DNA binding proteinPhi114\_41  
2360 Single stranded DNA binding proteinPhi129\_38  
2361 Single stranded DNA binding proteinPhi1316\_40  
2362 Single stranded DNA binding proteinPhi145\_41  
2363 Single stranded DNA binding proteinPhi155\_40  
2364 Single stranded DNA binding proteinPhi15\_42  
2365 Single stranded DNA binding proteinPhi16\_42  
2366 Single stranded DNA binding proteinPhi17\_41  
2367 Single stranded DNA binding proteinPhi19.2\_41  
2368 Single stranded DNA binding proteinPhi19.3\_39  
2369 Single stranded DNA binding proteinPhi19\_35  
2370 Single stranded DNA binding proteinPhi4.2\_43  
2371 Single stranded DNA binding proteinPhi40\_42  
2372 Single stranded DNA binding proteinPhi43\_38  
2373 Single stranded DNA binding proteinPhi44\_41  
2374 Single stranded DNA binding proteinPhi4\_37  
2375 Single stranded DNA binding proteinPhi5.12\_39  
2376 Single stranded DNA binding proteinPhi91127\_42  
2377 Single stranded DNA binding proteinPhi93\_43  
2378 Single stranded DNA binding proteinPhiA1127\_38  
2379 Single stranded DNA binding proteinPhiA16\_37  
2380 Single stranded DNA binding proteinPhiB1127\_40  
2381 Single stranded DNA binding proteinPhiC0139\_40

2382 Single stranded DNA binding proteinPhiD.18\_38  
2383 Single stranded DNA binding proteinPhiE1127\_42  
2384 Single stranded DNA binding proteinPhiF.17\_42  
2385 Single stranded DNA binding proteinPhiF0139\_42  
2386 Single stranded DNA binding proteinPhiG\_42  
2387 Single stranded DNA binding proteinPhiJF1\_42  
2388 Single stranded DNA binding proteinPhiL.18\_41  
2389 Single stranded DNA binding proteinPhiL.6\_44  
2390 Single stranded DNA binding proteinPhiLj\_36  
2391 Single stranded DNA binding proteinPhiM.16\_41  
2392 Single stranded DNA binding proteinPhiM.5\_43  
2393 Single stranded DNA binding proteinPhiM1127\_45  
2394 Single stranded DNA binding proteinPhiS0139\_38  
2395 Single stranded DNA binding proteinSL4\_0038  
2396 Single stranded DNA binding proteinViridisJM2\_gp41  
2397 Single stranded DNA binding proteinbIBB29\_gp41  
2398 Single stranded DNA binding proteinbIL170p47  
2399 Single stranded DNA binding proteinfd13\_0038  
2400 Single stranded DNA binding proteinjj50\_ORF33  
2401 Single stranded DNA binding proteinjm1\_0038  
2402 Single stranded DNA binding proteinp2\_0034  
2403 Single stranded DNA binding proteinphi7\_40  
2404 Single stranded DNA binding proteinsk1p36  
2405 Homologous reombinase Sak 340\_0043  
2406 Homologous reombinase Sak 645\_0039  
2407 Homologous reombinase Sak 936\_0038  
2408 Homologous reombinase Sak ASCC191\_0045  
2409 Homologous reombinase Sak ASCC273\_0044  
2410 Homologous reombinase Sak ASCC281\_0043  
2411 Homologous reombinase Sak ASCC284\_0043  
2412 Homologous reombinase Sak ASCC287\_0044  
2413 Homologous reombinase Sak ASCC310\_0043  
2414 Homologous reombinase Sak ASCC324\_0044  
2415 Homologous reombinase Sak ASCC337\_0044  
2416 Homologous reombinase Sak ASCC356\_0043  
2417 Homologous reombinase Sak ASCC358\_0043  
2418 Homologous reombinase Sak ASCC365\_0043  
2419 Homologous reombinase Sak ASCC368\_0044  
2420 Homologous reombinase Sak ASCC395\_0044  
2421 Homologous reombinase Sak ASCC397\_0044  
2422 Homologous reombinase Sak ASCC406\_0044  
2423 Homologous reombinase Sak ASCC454\_0044  
2424 Homologous reombinase Sak ASCC460\_0044  
2425 Homologous reombinase Sak ASCC465\_0044  
2426 Homologous reombinase Sak ASCC473\_0044  
2427 Homologous reombinase Sak ASCC476\_0044  
2428 Homologous reombinase Sak ASCC489\_0043  
2429 Homologous reombinase Sak ASCC497\_0044  
2430 Homologous reombinase Sak ASCC502\_0044  
2431 Homologous reombinase Sak ASCC506\_0044

2432 Homologous reombinase Sak ASCC527\_0044  
2433 Homologous reombinase Sak ASCC531\_0044  
2434 Homologous reombinase Sak ASCC532\_0045  
2435 Homologous reombinase Sak ASCC544\_0044  
2436 Homologous reombinase Sak CB13\_0042  
2437 Homologous reombinase Sak CB14\_0039  
2438 Homologous reombinase Sak CB19\_0039  
2439 Homologous reombinase Sak CB20\_0039  
2440 Homologous reombinase Sak LPPV008\_gp40  
2441 Homologous reombinase Sak LPV712\_gp035  
2442 Homologous reombinase Sak P113G\_0041  
2443 Homologous reombinase Sak P272\_0043  
2444 Homologous reombinase Sak P475\_0042  
2445 Homologous reombinase Sak P680\_39  
2446 Homologous reombinase Sak PastusJM3\_37  
2447 Homologous reombinase Sak Phi10.5\_48  
2448 Homologous reombinase Sak Phi109\_43  
2449 Homologous reombinase Sak Phi114\_42  
2450 Homologous reombinase Sak Phi129\_39  
2451 Homologous reombinase Sak Phi1316\_41  
2452 Homologous reombinase Sak Phi145\_42  
2453 Homologous reombinase Sak Phi155\_41  
2454 Homologous reombinase Sak Phi15\_43  
2455 Homologous reombinase Sak Phi16\_43  
2456 Homologous reombinase Sak Phi17\_42  
2457 Homologous reombinase Sak Phi19.2\_42  
2458 Homologous reombinase Sak Phi19.3\_40  
2459 Homologous reombinase Sak Phi19\_36  
2460 Homologous reombinase Sak Phi4.2\_44  
2461 Homologous reombinase Sak Phi40\_43  
2462 Homologous reombinase Sak Phi43\_39  
2463 Homologous reombinase Sak Phi44\_42  
2464 Homologous reombinase Sak Phi4\_38  
2465 Homologous reombinase Sak Phi5.12\_40  
2466 Homologous reombinase Sak Phi91127\_43  
2467 Homologous reombinase Sak Phi93\_44  
2468 Homologous reombinase Sak PhiA1127\_39  
2469 Homologous reombinase Sak PhiA16\_38  
2470 Homologous reombinase Sak PhiB1127\_41  
2471 Homologous reombinase Sak PhiC0139\_41  
2472 Homologous reombinase Sak PhiD.18\_39  
2473 Homologous reombinase Sak PhiE1127\_43  
2474 Homologous reombinase Sak PhiF.17\_43  
2475 Homologous reombinase Sak PhiF0139\_43  
2476 Homologous reombinase Sak PhiG\_43  
2477 Homologous reombinase Sak PhiJF1\_43  
2478 Homologous reombinase Sak PhiL.18\_42  
2479 Homologous reombinase Sak PhiL.6\_45  
2480 Homologous reombinase Sak PhiLj\_37  
2481 Homologous reombinase Sak PhiM.16\_42

2482 Homologous reombinase Sak PhiM.5\_44  
2483 Homologous reombinase Sak PhiM1127\_46  
2484 Homologous reombinase Sak PhiS0139\_39  
2485 Homologous reombinase Sak SL4\_0039  
2486 Homologous reombinase Sak ViridisJM2\_gp42  
2487 Homologous reombinase Sak bIBB29\_gp42  
2488 Homologous reombinase Sak bIL170p48  
2489 Homologous reombinase Sak fd13\_0039  
2490 Homologous reombinase Sak jj50\_ORF34  
2491 Homologous reombinase Sak jm1\_0039  
2492 Homologous reombinase Sak p2\_0035  
2493 Homologous reombinase Sak phi7\_41  
2494 Homologous reombinase Sak sk1p37  
2495 Hypothetical protein 340\_0045  
2496 Hypothetical protein 645\_0041  
2497 Hypothetical protein 936\_0039  
2498 Hypothetical protein ASCC191\_0047  
2499 Hypothetical protein ASCC273\_0046  
2500 Hypothetical protein ASCC281\_0045  
2501 Hypothetical protein ASCC284\_0045  
2502 Hypothetical protein ASCC287\_0046  
2503 Hypothetical protein ASCC310\_0045  
2504 Hypothetical protein ASCC324\_0046  
2505 Hypothetical protein ASCC337\_0046  
2506 Hypothetical protein ASCC356\_0045  
2507 Hypothetical protein ASCC358\_0045  
2508 Hypothetical protein ASCC365\_0045  
2509 Hypothetical protein ASCC368\_0046  
2510 Hypothetical protein ASCC395\_0046  
2511 Hypothetical protein ASCC397\_0046  
2512 Hypothetical protein ASCC406\_0046  
2513 Hypothetical protein ASCC454\_0046  
2514 Hypothetical protein ASCC460\_0046  
2515 Hypothetical protein ASCC465\_0046  
2516 Hypothetical protein ASCC473\_0046  
2517 Hypothetical protein ASCC476\_0046  
2518 Hypothetical protein ASCC489\_0044  
2519 Hypothetical protein ASCC497\_0046  
2520 Hypothetical protein ASCC502\_0046  
2521 Hypothetical protein ASCC506\_0046  
2522 Hypothetical protein ASCC527\_0046  
2523 Hypothetical protein ASCC531\_0047  
2524 Hypothetical protein ASCC532\_0047  
2525 Hypothetical protein ASCC544\_0046  
2526 Hypothetical protein CB13\_0043  
2527 Hypothetical protein CB14\_0041  
2528 Hypothetical protein CB19\_0041  
2529 Hypothetical protein CB20\_0041  
2530 Hypothetical protein LPPV008\_gp42  
2531 Hypothetical protein LPV712\_gp038

|      |                      |                 |
|------|----------------------|-----------------|
| 2532 | Hypothetical protein | P113G_0043      |
| 2533 | Hypothetical protein | P272_0045       |
| 2534 | Hypothetical protein | P475_0043a      |
| 2535 | Hypothetical protein | P680_40         |
| 2536 | Hypothetical protein | PastusJM3_39    |
| 2537 | Hypothetical protein | Phi10.5_50      |
| 2538 | Hypothetical protein | Phi109_44       |
| 2539 | Hypothetical protein | Phi114_43       |
| 2540 | Hypothetical protein | Phi129_40       |
| 2541 | Hypothetical protein | Phi1316_42      |
| 2542 | Hypothetical protein | Phi145_44       |
| 2543 | Hypothetical protein | Phi155_43       |
| 2544 | Hypothetical protein | Phi15_46        |
| 2545 | Hypothetical protein | Phi16_45        |
| 2546 | Hypothetical protein | Phi17_44        |
| 2547 | Hypothetical protein | Phi19.2_43      |
| 2548 | Hypothetical protein | Phi19.3_41      |
| 2549 | Hypothetical protein | Phi19_38        |
| 2550 | Hypothetical protein | Phi4.2_46       |
| 2551 | Hypothetical protein | Phi40_45        |
| 2552 | Hypothetical protein | Phi43_41        |
| 2553 | Hypothetical protein | Phi44_43        |
| 2554 | Hypothetical protein | Phi4_40         |
| 2555 | Hypothetical protein | Phi5.12_42      |
| 2556 | Hypothetical protein | Phi91127_45     |
| 2557 | Hypothetical protein | Phi93_45        |
| 2558 | Hypothetical protein | PhiA1127_41     |
| 2559 | Hypothetical protein | PhiA16_39       |
| 2560 | Hypothetical protein | PhiB1127_42     |
| 2561 | Hypothetical protein | PhiC0139_42     |
| 2562 | Hypothetical protein | PhiD.18_40      |
| 2563 | Hypothetical protein | PhiE1127_45     |
| 2564 | Hypothetical protein | PhiF.17_45      |
| 2565 | Hypothetical protein | PhiF0139_45     |
| 2566 | Hypothetical protein | PhiG_45         |
| 2567 | Hypothetical protein | PhiJF1_46       |
| 2568 | Hypothetical protein | PhiL.18_44      |
| 2569 | Hypothetical protein | PhiL.6_47       |
| 2570 | Hypothetical protein | PhiLj_38        |
| 2571 | Hypothetical protein | PhiM.16_43      |
| 2572 | Hypothetical protein | PhiM.5_46       |
| 2573 | Hypothetical protein | PhiM1127_47     |
| 2574 | Hypothetical protein | PhiS0139_41     |
| 2575 | Hypothetical protein | SL4_0040        |
| 2576 | Hypothetical protein | ViridisJM2_gp43 |
| 2577 | Hypothetical protein | bIBB29_gp43     |
| 2578 | Hypothetical protein | bIL170p50       |
| 2579 | Hypothetical protein | fd13_0041       |
| 2580 | Hypothetical protein | jj50_ORF37      |
| 2581 | Hypothetical protein | jm1_0041        |

2582 Hypothetical protein p2\_0038  
2583 Hypothetical protein phi7\_43  
2584 Hypothetical protein sk1p40  
2585 Middle expressed protein 2 340\_0055  
2586 Middle expressed protein 2 645\_0047  
2587 Middle expressed protein 2 936\_0046  
2588 Middle expressed protein 2 ASCC191\_0058  
2589 Middle expressed protein 2 ASCC273\_0057  
2590 Middle expressed protein 2 ASCC281\_0055  
2591 Middle expressed protein 2 ASCC284\_0056  
2592 Middle expressed protein 2 ASCC287\_0057  
2593 Middle expressed protein 2 ASCC310\_0054  
2594 Middle expressed protein 2 ASCC324\_0057  
2595 Middle expressed protein 2 ASCC337\_0057  
2596 Middle expressed protein 2 ASCC356\_0053  
2597 Middle expressed protein 2 ASCC358\_0055  
2598 Middle expressed protein 2 ASCC365\_0055  
2599 Middle expressed protein 2 ASCC368\_0057  
2600 Middle expressed protein 2 ASCC395\_0057  
2601 Middle expressed protein 2 ASCC397\_0057  
2602 Middle expressed protein 2 ASCC406\_0057  
2603 Middle expressed protein 2 ASCC454\_0057  
2604 Middle expressed protein 2 ASCC460\_0057  
2605 Middle expressed protein 2 ASCC465\_0055  
2606 Middle expressed protein 2 ASCC473\_0055  
2607 Middle expressed protein 2 ASCC476\_0057  
2608 Middle expressed protein 2 ASCC489\_0053  
2609 Middle expressed protein 2 ASCC497\_0055  
2610 Middle expressed protein 2 ASCC502\_0057  
2611 Middle expressed protein 2 ASCC506\_0057  
2612 Middle expressed protein 2 ASCC527\_0057  
2613 Middle expressed protein 2 ASCC531\_0056  
2614 Middle expressed protein 2 ASCC532\_0056  
2615 Middle expressed protein 2 ASCC544\_0057  
2616 Middle expressed protein 2 CB13\_0052  
2617 Middle expressed protein 2 CB14\_0049  
2618 Middle expressed protein 2 CB19\_0048  
2619 Middle expressed protein 2 CB20\_0048  
2620 Middle expressed protein 2 LPPV008\_gp54  
2621 Middle expressed protein 2 LPV712\_gp052  
2622 Middle expressed protein 2 P113G\_0054  
2623 Middle expressed protein 2 P272\_0057  
2624 Middle expressed protein 2 P475\_0054  
2625 Middle expressed protein 2 P680\_48  
2626 Middle expressed protein 2 PastusJM3\_47  
2627 Middle expressed protein 2 Phi10.5\_61  
2628 Middle expressed protein 2 Phi109\_52  
2629 Middle expressed protein 2 Phi114\_51  
2630 Middle expressed protein 2 Phi129\_52  
2631 Middle expressed protein 2 Phi1316\_52



|      |                                 |                 |
|------|---------------------------------|-----------------|
| 2632 | Middle expressed protein 2      | Phi145_52       |
| 2633 | Middle expressed protein 2      | Phi155_52       |
| 2634 | Middle expressed protein 2      | Phi15_53        |
| 2635 | Middle expressed protein 2      | Phi16_54        |
| 2636 | Middle expressed protein 2      | Phi17_54        |
| 2637 | Middle expressed protein 2      | Phi19.2_53      |
| 2638 | Middle expressed protein 2      | Phi19.3_50      |
| 2639 | Middle expressed protein 2      | Phi19_48        |
| 2640 | Middle expressed protein 2      | Phi4.2_56       |
| 2641 | Middle expressed protein 2      | Phi40_54        |
| 2642 | Middle expressed protein 2      | Phi43_52        |
| 2643 | Middle expressed protein 2      | Phi44_50        |
| 2644 | Middle expressed protein 2      | Phi4_49         |
| 2645 | Middle expressed protein 2      | Phi5.12_51      |
| 2646 | Middle expressed protein 2      | Phi91127_54     |
| 2647 | Middle expressed protein 2      | Phi93_53        |
| 2648 | Middle expressed protein 2      | PhiA1127_50     |
| 2649 | Middle expressed protein 2      | PhiA16_47       |
| 2650 | Middle expressed protein 2      | PhiB1127_51     |
| 2651 | Middle expressed protein 2      | PhiC0139_51     |
| 2652 | Middle expressed protein 2      | PhiD.18_51      |
| 2653 | Middle expressed protein 2      | PhiE1127_57     |
| 2654 | Middle expressed protein 2      | PhiF.17_54      |
| 2655 | Middle expressed protein 2      | PhiF0139_54     |
| 2656 | Middle expressed protein 2      | PhiG_55         |
| 2657 | Middle expressed protein 2      | PhiJF1_55       |
| 2658 | Middle expressed protein 2      | PhiL.18_53      |
| 2659 | Middle expressed protein 2      | PhiL.6_56       |
| 2660 | Middle expressed protein 2      | PhiLj_47        |
| 2661 | Middle expressed protein 2      | PhiM.16_52      |
| 2662 | Middle expressed protein 2      | PhiM.5_55       |
| 2663 | Middle expressed protein 2      | PhiM1127_57     |
| 2664 | Middle expressed protein 2      | PhiS0139_51     |
| 2665 | Middle expressed protein 2      | SL4_0049        |
| 2666 | Middle expressed protein 2      | ViridisJM2_gp57 |
| 2667 | Middle expressed protein 2      | bIBB29_gp52     |
| 2668 | Middle expressed protein 2      | bIL170p62       |
| 2669 | Middle expressed protein 2      | fd13_0051       |
| 2670 | Middle expressed protein 2      | jj50_ORF47      |
| 2671 | Middle expressed protein 2      | jm1_0049        |
| 2672 | Middle expressed protein 2      | p2_0047         |
| 2673 | Middle expressed protein 2      | phi7_54         |
| 2674 | Middle expressed protein 2      | sk1p54          |
| 2675 | RuvC-Like holliday endonuclease | 340_0056        |
| 2676 | RuvC-Like holliday endonuclease | 645_0048        |
| 2677 | RuvC-Like holliday endonuclease | 936_0047        |
| 2678 | RuvC-Like holliday endonuclease | ASCC191_0059    |
| 2679 | RuvC-Like holliday endonuclease | ASCC273_0058    |
| 2680 | RuvC-Like holliday endonuclease | ASCC281_0056    |
| 2681 | RuvC-Like holliday endonuclease | ASCC284_0057    |

|      |                                 |              |
|------|---------------------------------|--------------|
| 2682 | RuvC-Like holliday endonuclease | ASCC287_0058 |
| 2683 | RuvC-Like holliday endonuclease | ASCC310_0055 |
| 2684 | RuvC-Like holliday endonuclease | ASCC324_0058 |
| 2685 | RuvC-Like holliday endonuclease | ASCC337_0058 |
| 2686 | RuvC-Like holliday endonuclease | ASCC356_0054 |
| 2687 | RuvC-Like holliday endonuclease | ASCC358_0056 |
| 2688 | RuvC-Like holliday endonuclease | ASCC365_0056 |
| 2689 | RuvC-Like holliday endonuclease | ASCC368_0058 |
| 2690 | RuvC-Like holliday endonuclease | ASCC395_0058 |
| 2691 | RuvC-Like holliday endonuclease | ASCC397_0058 |
| 2692 | RuvC-Like holliday endonuclease | ASCC406_0058 |
| 2693 | RuvC-Like holliday endonuclease | ASCC454_0058 |
| 2694 | RuvC-Like holliday endonuclease | ASCC460_0058 |
| 2695 | RuvC-Like holliday endonuclease | ASCC465_0056 |
| 2696 | RuvC-Like holliday endonuclease | ASCC473_0056 |
| 2697 | RuvC-Like holliday endonuclease | ASCC476_0058 |
| 2698 | RuvC-Like holliday endonuclease | ASCC489_0054 |
| 2699 | RuvC-Like holliday endonuclease | ASCC497_0056 |
| 2700 | RuvC-Like holliday endonuclease | ASCC502_0058 |
| 2701 | RuvC-Like holliday endonuclease | ASCC506_0058 |
| 2702 | RuvC-Like holliday endonuclease | ASCC527_0058 |
| 2703 | RuvC-Like holliday endonuclease | ASCC531_0057 |
| 2704 | RuvC-Like holliday endonuclease | ASCC532_0057 |
| 2705 | RuvC-Like holliday endonuclease | ASCC544_0058 |
| 2706 | RuvC-Like holliday endonuclease | CB13_0053    |
| 2707 | RuvC-Like holliday endonuclease | CB14_0050    |
| 2708 | RuvC-Like holliday endonuclease | CB19_0049    |
| 2709 | RuvC-Like holliday endonuclease | CB20_0049    |
| 2710 | RuvC-Like holliday endonuclease | LPPV008_gp55 |
| 2711 | RuvC-Like holliday endonuclease | LPV712_gp053 |
| 2712 | RuvC-Like holliday endonuclease | P113G_0055   |
| 2713 | RuvC-Like holliday endonuclease | P272_0058    |
| 2714 | RuvC-Like holliday endonuclease | P475_0055    |
| 2715 | RuvC-Like holliday endonuclease | P680_49      |
| 2716 | RuvC-Like holliday endonuclease | PastusJM3_48 |
| 2717 | RuvC-Like holliday endonuclease | Phi10.5_62   |
| 2718 | RuvC-Like holliday endonuclease | Phi109_53    |
| 2719 | RuvC-Like holliday endonuclease | Phi114_52    |
| 2720 | RuvC-Like holliday endonuclease | Phi129_53    |
| 2721 | RuvC-Like holliday endonuclease | Phi1316_53   |
| 2722 | RuvC-Like holliday endonuclease | Phi145_53    |
| 2723 | RuvC-Like holliday endonuclease | Phi155_53    |
| 2724 | RuvC-Like holliday endonuclease | Phi15_54     |
| 2725 | RuvC-Like holliday endonuclease | Phi16_55     |
| 2726 | RuvC-Like holliday endonuclease | Phi17_55     |
| 2727 | RuvC-Like holliday endonuclease | Phi19.2_54   |
| 2728 | RuvC-Like holliday endonuclease | Phi19.3_51   |
| 2729 | RuvC-Like holliday endonuclease | Phi19_49     |
| 2730 | RuvC-Like holliday endonuclease | Phi4.2_57    |
| 2731 | RuvC-Like holliday endonuclease | Phi40_55     |

|      |                                 |                 |
|------|---------------------------------|-----------------|
| 2732 | RuvC-Like holliday endonuclease | Phi43_53        |
| 2733 | RuvC-Like holliday endonuclease | Phi44_51        |
| 2734 | RuvC-Like holliday endonuclease | Phi4_50         |
| 2735 | RuvC-Like holliday endonuclease | Phi5.12_52      |
| 2736 | RuvC-Like holliday endonuclease | Phi91127_55     |
| 2737 | RuvC-Like holliday endonuclease | Phi93_54        |
| 2738 | RuvC-Like holliday endonuclease | PhiA1127_51     |
| 2739 | RuvC-Like holliday endonuclease | PhiA16_48       |
| 2740 | RuvC-Like holliday endonuclease | PhiB1127_52     |
| 2741 | RuvC-Like holliday endonuclease | PhiC0139_52     |
| 2742 | RuvC-Like holliday endonuclease | PhiD.18_52      |
| 2743 | RuvC-Like holliday endonuclease | PhiE1127_58     |
| 2744 | RuvC-Like holliday endonuclease | PhiF.17_55      |
| 2745 | RuvC-Like holliday endonuclease | PhiF0139_55     |
| 2746 | RuvC-Like holliday endonuclease | PhiG_56         |
| 2747 | RuvC-Like holliday endonuclease | PhiJF1_56       |
| 2748 | RuvC-Like holliday endonuclease | PhiL.18_54      |
| 2749 | RuvC-Like holliday endonuclease | PhiL.6_57       |
| 2750 | RuvC-Like holliday endonuclease | PhiLj_48        |
| 2751 | RuvC-Like holliday endonuclease | PhiM.16_53      |
| 2752 | RuvC-Like holliday endonuclease | PhiM.5_56       |
| 2753 | RuvC-Like holliday endonuclease | PhiM1127_58     |
| 2754 | RuvC-Like holliday endonuclease | PhiS0139_52     |
| 2755 | RuvC-Like holliday endonuclease | SL4_0050        |
| 2756 | RuvC-Like holliday endonuclease | ViridisJM2_gp58 |
| 2757 | RuvC-Like holliday endonuclease | bIBB29_gp53     |
| 2758 | RuvC-Like holliday endonuclease | bIL170p63       |
| 2759 | RuvC-Like holliday endonuclease | fd13_0052       |
| 2760 | RuvC-Like holliday endonuclease | jj50_ORF48      |
| 2761 | RuvC-Like holliday endonuclease | jm1_0050        |
| 2762 | RuvC-Like holliday endonuclease | p2_0048         |
| 2763 | RuvC-Like holliday endonuclease | phi7_55         |
| 2764 | RuvC-Like holliday endonuclease | sk1p55          |
| 2765 |                                 |                 |
